# Supplementary material for: CRISPR/Cas9 Editing of the Mutant Huntingtin Allele In Vitro and In Vivo
Source: PubMed Central journal article supplement — Mol Ther. 2017 Jan 4;25(1):12–23. doi: 10.1016/j.ymthe.2016.11.010 (PMC5363210; doi:10.1016/j.ymthe.2016.11.010), 2017-01-04
Supplement: mmc1.pdf [file mmc1.pdf]

**YMTHE, Volume 25**

**Supplemental Information**

**CRISPR/Cas9 Editing of the Mutant  
Huntingtin Allele In Vitro and In Vivo**

**Alex Mas Monteys, Shauna A. Ebanks, Megan S. Keiser, and Beverly L. Davidson**

**Figure S1:** List of SNP-dependent PAMs targeted by different CRISPR systems flanking *HTT* exon-1.

**HD PROMOTER TARGETED SNPs**

---

| # Variant ID | Sequence Variation                                          | Ref. Allele | Min. allele |
|--------------|-------------------------------------------------------------|-------------|-------------|
| rs35631490   | GTCTGCGTCAGGGTTTCCTTCTTTT [ C/G ] CAGCCCCACCCCGCGTGCATCCCAC | C           | G           |

**SpCas9\_WT (PAM Motif: NRG)**

Ref. Allele:

CGGGGTGGGGCGCACGTAGG

5' GTCTGCGTCAGGGTTTCCTTCTTTT**C**CAGCCCCACCCCGCGTGCATCCCAC 3'

3' CAGACGCAGTCCCAAAGGAAGAAA**AGG**TCGGGGTGGGGCGCACGTAGGGTG 5'

**PAM**

Minor Allele

5' GTCTGCGTCAGGGTTTCCTTCTTTT**G**CAGCCCCACCCCGCGTGCATCCCAC 3'

3' CAGACGCAGTCCCAAAGGAAGAAA**ACG**TCGGGGTGGGGCGCACGTAGGGTG 5'

**SpCas9\_VQR/EQR (PAM Motif: NGAN-NGNG/NGAG)**

Ref. Allele:

TCGGGGTGGGGCGCACGTAG

5' GTCTGCGTCAGGGTTTCCTTCTTTT**C**CAGCCCCACCCCGCGTGCATCCCAC 3'

3' CAGACGCAGTCCCAAAGGAAGAAA**AGG**TCGGGGTGGGGCGCACGTAGGGTG 5'

**PAM**

Minor Allele

5' GTCTGCGTCAGGGTTTCCTTCTTTT**G**CAGCCCCACCCCGCGTGCATCCCAC 3'

3' CAGACGCAGTCCCAAAGGAAGAAA**ACG**TCGGGGTGGGGCGCACGTAGGGTG 5'

**SaCas9 (NNGRRT/NNGRR) :**

Ref. Allele:

CGGGGTGGGGCGCACGTAGG

5' GTCTGCGTCAGGGTTTCCTTCTTTT**C**CAGCCCCACCCCGCGTGCATCCCAC 3'

3' CAGACGCAGTCCCAAAGGAAGAAA**AGG**TCGGGGTGGGGCGCACGTAGGGTG 5'

**PAM**

Minor Allele

5' GTCTGCGTCAGGGTTTCCTTCTTTT**G**CAGCCCCACCCCGCGTGCATCCCAC 3'

3' CAGACGCAGTCCCAAAGGAAGAAA**ACG**TCGGGGTGGGGCGCACGTAGGGTG 5'

**LbCpf1 (TTTN/TTCN/CTTN/TCTN/ATTN/TCCN/...):**

Ref. Allele:

**PAM**

5' GTCTGCGTCAGGGTTTCCTTCTTTTCCAGCCCCACCCCGCGTGCATCCCAC 3'  
3' CAGACGCAGTCCCAAAGGAAGAAAAGGTCGGGGTGGGGCGCACGTAGGGTG 5'  
GCCCCACCCCGCGTGCATCC

Minor Allele

5' GTCTGCGTCAGGGTTTCCTTCTTTTGAGCCCCACCCCGCGTGCATCCCAC 3'  
3' CAGACGCAGTCCCAAAGGAAGAAAACGTCGGGGTGGGGCGCACGTAGGGTG 5'

---

| # Variant ID | Sequence Variation                                    | Ref.Allele | Min. allele |
|--------------|-------------------------------------------------------|------------|-------------|
| rs73086139   | TCAAGGCCTCTTCTCTTCTCGGC[A/G]GGACAGGCACAGGCAGGTGGCCAGG | A          | G           |

**SpCas9\_VQR/EQR (PAM Motif: NGAN-NGNG/NGAG)**

Ref. Allele:

5' TCAAGGCCTCTTCTCTTCTCGGCAGGACAGGCACAGGCAGGTGGCCAGG 3'  
3' AGTTCCGGAGAAGAGAGAAGAGCCGTCCTGTCCGTGTCCGTCCACCGGTCC 5'

Minor Allele:

**PAM**

5' TCAAGGCCTCTTCTCTTCTCGGCAGGACAGGCACAGGCAGGTGGCCAGG 3'  
3' AGTTCCGGAGAAGAGAGAAGAGCCGCCCTGTCCGTGTCCGTCCACCGGTCC 5'  
GGCCTCTTCTCTTCTCG

**SpCas9\_VRER (PAM Motif: NGCG)**

Ref. Allele:

5' TCAAGGCCTCTTCTCTTCTCGGCAGGACAGGCACAGGCAGGTGGCCAGG 3'  
3' AGTTCCGGAGAAGAGAGAAGAGCCGTCCTGTCCGTGTCCGTCCACCGGTCC 5'

Minor Allele:

**PAM**

5' TCAAGGCCTCTTCTCTTCTCGGCAGGACAGGCACAGGCAGGTGGCCAGG 3'  
3' AGTTCCGGAGAAGAGAGAAGAGCCGCCCTGTCCGTGTCCGTCCACCGGTCC 5'

GGCCTCTTCTCTCTTCTCG

**SaCas9 (NNGRRT/NNGRR) :**

Ref. Allele:

5' TCAAGGCCTCTTCTCTCTTCTCGGCAGGACAGGCACAGGCAGGTGGCCAGG  
3' AGTTCCGGAGAAGAGAGAAGAGCCGTCCTGTCCGTGTCCGTCCACCGGTCC

Minor Allele:

**PAM**  
5' TCAAGGCCTCTTCTCTCTTCTCG**GGGG**ACAGGCACAGGCAGGTGGCCAGG  
3' AGTTCCGGAGAAGAGAGAAGAGCC**CC**CTGTCCGTGTCCGTCCACCGGTCC  
GGCCTCTTCTCTCTTCTCG

---

| # Variant ID | Sequence Variation                                            | Ref. Allele | Min. allele |
|--------------|---------------------------------------------------------------|-------------|-------------|
| rs73086140   | GCCAGGTGTCATGCTTAGCTCCCCG [ C / G ] CCAGTGAGATTCTTTCATTTAACAA | C           | G           |

**SpCas9\_WT (PAM Motif: NRG)**

Ref. Allele:

**PAM**  
5' GCCAGGTGTCATGCTTAGCTCCCCG**CC**AGTGAGATTCTTTCATTTAACAA  
3' CGGTCCACAGTACGAATCGAGGGG**CGG**TCACTCTAAGAAAGTAAATTGTT  
**PAM**

Minor Allele:

**PAM**  
5' GCCAGGTGTCATGCTTAGCTCCCC**CGG**CCAGTGAGATTCTTTCATTTAACAA  
3' CGGTCCACAGTACGAATCGAGGGG**CGG**TCACTCTAAGAAAGTAAATTGTT  
AGGTGTCATGCTTAGCTCCC

**SpCas9\_VQR/EQR (PAM Motif: NGAN-NGNG/NGAG)**

Ref. Allele:

**PAM**  
5' GCCAGGTGTCATGCTTAGCTCCCCG**CC**AGTGAGATTCTTTCATTTAACAA  
3' CGGTCCACAGTACGAATCGAGGGG**CGG**GTCACCTAAGAAAGTAAATTGTT  
**PAM**

Minor Allele:



5' GCCAGGTGTCATGCTTAGCTCCCCG**CC**CAGTGAGATTCTTTTCATTTAACAA  
 CGGTCCACAGTACGAATCGAGGGGC**CG**GGTCACTCTAAGAAAGTAAATTGTT

**SpCas9\_VRER (PAM Motif: NGCG)**

Ref. Allele:

GGTCACTCTAAGAAAGTAAATT

5' GCCAGGTGTCATGCTTAGCTCCCCG**CC**CAGTGAGATTCTTTTCATTTAACAA  
 3' CGGTCCACAGTACGAATCGAGGG**GCG**GGTCACTCTAAGAAAGTAAATTGTT  
**PAM**

Minor Allele:

5' GCCAGGTGTCATGCTTAGCTCCCCG**CC**CAGTGAGATTCTTTTCATTTAACAA  
 CGGTCCACAGTACGAATCGAGGGGC**CG**GGTCACTCTAAGAAAGTAAATTGTT

| # Variant ID | Sequence Variation                                            | Ref.Allele | Min. allele |
|--------------|---------------------------------------------------------------|------------|-------------|
| rs61791259   | GATTACAGGCACCTGCCACCATGCC [ C / T ] GGCTAATTTTTGTATTTTTAGTTGA | C          | T           |

**SaCas9 (PAM Motif: NNGRRT)**

Ref. Allele:

GATTAAAAACATAAAAAATCA

5' GATTACAGGCACCTGCCACCATGCC**CG**GGCTAATTTTTGTATTTTTAGTTGA  
 3' CTAATGTCCGTGGACGGTGGTAC**CGGGCC**GATTAAAAACATAAAAAATCAACT  
**PAM**

Minor Allele:

GATTACAGGCACCTGCCACCATGCC**T**GGCTAATTTTTGTATTTTTAGTTGA  
 CTAATGTCCGTGGACGGTGGTACGG**A**CCGATTAAAAACATAAAAAATCAACT

| # Variant ID | Sequence Variation                                            | Ref.Allele | Min. allele |
|--------------|---------------------------------------------------------------|------------|-------------|
| rs61792460   | GAGGGTTTCATCTTGTTGGTCAGGC [ A / G ] GACTTGAACCTCTGACCTCAGGTGA | G          | A           |

**SpCas9\_VQR/EQR (PAM Motif: NGAN-NGNG/NGAG)**

Ref. Allele:

**PAM**

GAGGGTTTCATCTTGTTGGTCAGG**CG**GACTTGAACCTCCTGACCTCAGGTGA  
CTCCCAAAGTAGAACAACCAGTCCG**C**CTGAACTTGAGGACTGGAGTCCACT  
GGTTTCATCTTGTTGGTCAG

Minor Allele:

GAGGGTTTCATCTTGTTGGTCAGG**C**AGACTTGAACCTCCTGACCTCAGGTGA  
CTCCCAAAGTAGAACAACCAGTCCG**T**CTGAACTTGAGGACTGGAGTCCACT

**SpCas9\_VRER (PAM Motif: NGCG)**

Ref. Allele:

**PAM**

GAGGGTTTCATCTTGTTGGTCAGG**CG**GACTTGAACCTCCTGACCTCAGGTGA  
CTCCCAAAGTAGAACAACCAGTCCG**C**CTGAACTTGAGGACTGGAGTCCACT  
GGTTTCATCTTGTTGGTCAG

Minor Allele:

GAGGGTTTCATCTTGTTGGTCAGG**C**AGACTTGAACCTCCTGACCTCAGGTGA  
CTCCCAAAGTAGAACAACCAGTCCG**T**CTGAACTTGAGGACTGGAGTCCACT

**SaCas9 (NNGRRT/NNGRR)**

Ref. Allele:

**PAM**

GAGGGTTTCATCTTGTTGGTCAGG**CG**GACTTGAACCTCCTGACCTCAGGTGA  
CTCCCAAAGTAGAACAACCAGTCCG**C**CTGAACTTGAGGACTGGAGTCCACT  
GGTTTCATCTTGTTGGTCAG

Minor Allele:

GAGGGTTTCATCTTGTTGGTCAGG**C**AGACTTGAACCTCCTGACCTCAGGTGA  
CTCCCAAAGTAGAACAACCAGTCCG**T**CTGAACTTGAGGACTGGAGTCCACT

---

| # Variant ID | Sequence Variation                                       | Ref.Allele | Min. allele |
|--------------|----------------------------------------------------------|------------|-------------|
| rs73086145   | GCTGTTTTTTCTTTAGAAATGGGGGA[C/G]GTTATCAGGCTCTACATGGTGTGTA | C          | G           |

**SpCas9\_WT (PAM Motif: NRG)**

Ref. Allele:

GCTGTTTTTTCTTTAGAAATGGGGG**C**GTTATCAGGCTCTACATGGTGTGTA

CGACAAAAAAGAAATCTTACCCCCTGCAATAGTCCGAGATGTACCACACAT

Minor Allele

**PAM**

GCTGTTTTTTCTTTAGAAATGGGG**GAG**GTTATCAGGCTCTACATGGTGTGTA  
CGACAAAAAAGAAATCTTACCCCCTCCAATAGTCCGAGATGTACCACACAT  
GTTTTTTCTTTAGAAATGGGG

---

| # Variant ID | Sequence Variation                                           | Ref. Allele | Min. allele |
|--------------|--------------------------------------------------------------|-------------|-------------|
| rs61792461   | TCTACATGGTGTGTAGTCCGGCTAGC [ A/G ] TGTTGTAAGCCTTTCCCTGTGTCAC | A           | G           |

**SpCas9\_VQR/EQR (PAM Motif: NGAN-NGNG/NGAG)**

Ref. Allele:

TCTACATGGTGTGTAGTCCGGCTAGC**A**TGTTGTAAGCCTTTCCCTGTGTCAC  
AGATGTACCACACATCAGCCGATCGTACAACATTCGGAAAGGGACACAGTG

Minor Allele

**PAM**

TCTACATGGTGTGTAGTCCGGCTAG**CG**TGTTGTAAGCCTTTCCCTGTGTCAC  
AGATGTACCACACATCAGCCGATCGCACAACATTCGGAAAGGGACACAGTG  
ACATGGTGTGTAGTCCGGCTA

**SpCas9\_VRER (PAM Motif: NGCG)**

Ref. Allele:

TCTACATGGTGTGTAGTCCGGCTAGC**A**TGTTGTAAGCCTTTCCCTGTGTCAC  
AGATGTACCACACATCAGCCGATCGTACAACATTCGGAAAGGGACACAGTG

Minor Allele

**PAM**

TCTACATGGTGTGTAGTCCGGCTAG**CG**TGTTGTAAGCCTTTCCCTGTGTCAC  
AGATGTACCACACATCAGCCGATCGCACAACATTCGGAAAGGGACACAGTG  
ACATGGTGTGTAGTCCGGCTA

---

| # Variant ID | Sequence Variation                                      | Ref.Allele | Min. allele |
|--------------|---------------------------------------------------------|------------|-------------|
| rs61792462   | CTGTGTCACAAGTGCTCATCTGGAA[C/G]AGGATTCTAATGACTGCCTGTGGCT | C          | G           |

**SpCas9\_WT (PAM Motif: NRG)**

Ref. Allele:

CTGTGTCACAAGTGCTCATCTGGAA**C**AGGATTCTAATGACTGCCTGTGGCT  
GACACAGTGTTTACGAGTAGACCTTGTCTAAGATTACTGACGGACACCGA

Minor Allele

**PAM**

CTGTGTCACAAGTGCTCATCTGGAA**AG**AGGATTCTAATGACTGCCTGTGGCT  
GACACAGTGTTTACGAGTAGACCTTCTCTAAGATTACTGACGGACACCGA  
GTCACAAGTGCTCATCTGG

**SpCas9\_VQR/EQR (PAM Motif: NGAN-NGNG/NGAG)**

Ref. Allele:

CTGTGTCACAAGTGCTCATCTGGAA**C**AGGATTCTAATGACTGCCTGTGGCT  
GACACAGTGTTTACGAGTAGACCTTGTCTAAGATTACTGACGGACACCGA

Minor Allele

**PAM**

CTGTGTCACAAGTGCTCATCTGGAA**AG**AGGATTCTAATGACTGCCTGTGGCT  
GACACAGTGTTTACGAGTAGACCTTCTCTAAGATTACTGACGGACACCGA  
GTCACAAGTGCTCATCTGGA

**SaCas9 (NNGRRT/NNGRR)**

Ref. Allele:

CTGTGTCACAAGTGCTCATCTGGAA**C**AGGATTCTAATGACTGCCTGTGGCT  
GACACAGTGTTTACGAGTAGACCTTGTCTAAGATTACTGACGGACACCGA

Minor Allele

**PAM**

CTGTGTCACAAGTGCTCATCTGGAA**AGAG**GATTCTAATGACTGCCTGTGGCT  
GACACAGTGTTTACGAGTAGACCTTCTCTAAGATTACTGACGGACACCGA  
GTCACAAGTGCTCATCTGG

**LbCpf1 (TTN/TTCN/CTTN/TCTN/ATTN/TCCN/...)**

Ref. Allele:

CTGTGTCACAAGTGCTCATCTGGAA**C**AGGATTCTAATGACTGCCTGTGGCT  
GACACAGTGTTTACGAGTAGACCTTGTCTTAAGATTACTGACGGACACCGA

Minor Allele

GACACAGTGTTTACGAGTAGACC  
CTGTGTCACAAGTGCTCATCTGGAA**G**AGGATTCTAATGACTGCCTGTGGCT  
GACACAGTGTTTACGAGTAGACC**TTCT**CCTAAGATTACTGACGGACACCGA  
**PAM**

---

| # Variant ID | Sequence Variation                                      | Ref.Allele | Min. allele |
|--------------|---------------------------------------------------------|------------|-------------|
| rs61090955   | TCATTTTATGTGATTCCTTTCTAGA[A/G]GTACTACTCATTACTTCTGCTTGCA | A          | G           |

**SpCas9\_WT (PAM Motif: NRG)**

Ref. Allele:

TCATTTTATGTGATTCCTTTCTAGA**A**GTACTACTCATTACTTCTGCTTGCA  
AGTAAAATACACTAAGGAAAGATCTTCATGATGAGTAATGAAGACGAACGT

Minor Allele

**PAM**  
TCATTTTATGTGATTCCTTTCTAGA**GAG**GTACTACTCATTACTTCTGCTTGCA  
AGTAAAATACACTAAGGAAAGATCTCCATGATGAGTAATGAAGACGAACGT  
TTTTATGTGATTCCTTTCTA

**LbCpf1 (TTN/TTCN/CTTN/TCTN/ATTN/TCCN/...)**

Ref. Allele:

GTAAAATACACTAAGGAAAGA  
TCATTTTATGTGATTCCTTTCTAGA**A**GTACTACTCATTACTTCTGCTTGCA  
AGTAAAATACACTAAGGAAAGAT**TCTT**CATGATGAGTAATGAAGACGAACGT  
**PAM**

Minor Allele

TCATTTTATGTGATTCCTTTCTAGA**G**GTACTACTCATTACTTCTGCTTGCA

AGTAAAATACACTAAGGAAAGATCTCCATGATGAGTAATGAAGACGAACGT

---

| # Variant ID | Sequence Variation                                       | Ref.Allele | Min. allele |
|--------------|----------------------------------------------------------|------------|-------------|
| rs77384845   | TAGCTGAAGGAAGGACAGGGACTGT[C/T]ATACACTAGCTAAGAGGCAAACCTGC | C          | T           |

**SpCas9\_VQR/EQR (PAM Motif: NGAN-NGNG/NGAG)**

Ref. Allele:

ATGTGATCGATTCTCCG  
TAGCTGAAGGAAGGACAGGGACTGT**C**ATACACTAGCTAAGAGGCAAACCTGC  
ATCGACTTCCTTCCTGTCCCTGAC**AGT**ATGTGATCGATTCTCCGTTTGACG  
**PAM**

Minor Allele

TAGCTGAAGGAAGGACAGGGACTGT**T**ATACACTAGCTAAGAGGCAAACCTGC  
ATCGACTTCCTTCCTGTCCCTGACAATATGTGATCGATTCTCCGTTTGACG

---

| # Variant ID | Sequence Variation                                     | Ref.Allele | Min. allele |
|--------------|--------------------------------------------------------|------------|-------------|
| rs61792464   | TCCCTCATTAGGTTGATGTCCTAA[C/G]CCCCAGAACCTCAGAATGGGATTGT | G          | C           |

**SpCas9\_WT (PAM Motif: NRG)**

Ref. Allele:

GGTCTTGGAGTCTTACCCTA  
TCCCTCATTAGGTTGATGTCCTAA**C**CCCCAGAACCTCAGAATGGGATTGT  
AGGGAGTAAGTCCAACCTACAGGATT**GGG**GGTCTTGGAGTCTTACCCTAACA  
**PAM**

Minor Allele

**PAM**  
TCCCTCATTAGGTTGATGTCCTAA**G**CCCCAGAACCTCAGAATGGGATTGT  
AGGGAGTAAGTCCAACCTACAGGATT**CGGG**GTCTTGGAGTCTTACCCTAACA  
TCATTAGGTTGATGTCCT

**LbCpf1 (TTN/TTCN/CTTN/TCTN/ATTN/TCCN/...)**

Ref. Allele:

TCCCTCATTAGGTTGATGTCCTAA**C**CCCCAGAACCTCAGAATGGGATTGT  
AGGGAGTAAGTCCAACCTACAGGATTGGGGGTCTTGGAGTCTTACCCTAACA

Minor Allele

GGAGTAAGTCCAACACTACAGG  
 TCCCTCATTCAAGTTGATGTCTCTAAAGCCCCAGAACCTCAGAATGGGATTGT  
 AGGGAGTAAGTCCAACACTACAGG**ATTTC**GGGGTCTTGGAGTCTTACCCTAACA  
**PAM**

---

| # Variant ID | Sequence Variation                                      | Ref.Allele | Min. allele |
|--------------|---------------------------------------------------------|------------|-------------|
| rs112435590  | TCCATGCCAAGAAGGCAACAGAGAG[G/T]GCCAGGGAGACTGAAGTCATACCCT | G          | T           |

**SpCas9\_WT (PAM Motif: NRG)**

Ref. Allele:

**PAM**  
 TCCATGCCAAGAAGGCAACAGAGAG**AGG**GCCAGGGAGACTGAAGTCATACCCT  
 AGGTACGGTTCTTCCGTTGTCTCTCCCGGTCCCTCTGACTTCAGTATGGGA  
 ATGCCAAGAAGGCAACAGAG

Minor Allele

TCCATGCCAAGAAGGCAACAGAGAG**T**GCCAGGGAGACTGAAGTCATACCCT  
 AGGTACGGTTCTTCCGTTGTCTCTCACGGTCCCTCTGACTTCAGTATGGGA

**SaCas9 (NNGRRT/NNGRR)**

Ref. Allele:

**PAM**  
 TCCATGCCAAGAAGGCAACAGAGAG**G**GCCAGGGAGACTGAAGTCATACCCT  
 AGGTACGGTTCTTCCGTTGTCTCTCCCGGTCCCTCTGACTTCAGTATGGGA  
 TCCATGCCAAGAAGGCAACA

Minor Allele

**PAM**  
 TCCATGCCAAGAAGGCAACAGAGAG**T**GCCAGGGAGACTGAAGTCATACCCT  
 AGGTACGGTTCTTCCGTTGTCTCTCACGGTCCCTCTGACTTCAGTATGGGA  
 TCCATGCCAAGAAGGCAACA

---

| # Variant ID | Sequence Variation                                      | Ref.Allele | Min. allele |
|--------------|---------------------------------------------------------|------------|-------------|
| rs111670395  | CCCAGGTTCAAGCAATTCTGCCTCA[A/G]CCTCCGGAATAGCTGGGACTACAGG | G          | A           |

**SpCas9\_WT (PAM Motif: NRG)**

Ref. Allele:

**PAM**

CCCAGGTTCAAGCAATTCTGCCT**CAG**CCTCCGGAATAGCTGGGACTACAGG  
 GGGTCCAAGTTCGTTAAGACGGAGTCGGAGGCCTTATCGACCCTGATGTCC  
 GGTTCAAGCAATTCTGCCT

Minor Allele

CCCAGGTTCAAGCAATTCTGCCTCA**A**CCTCCGGAATAGCTGGGACTACAGG  
 GGGTCCAAGTTCGTTAAGACGGAGTTGGAGGCCTTATCGACCCTGATGTCC

---

| # Variant ID | Sequence Variation                                        | Ref.Allele | Min. allele |
|--------------|-----------------------------------------------------------|------------|-------------|
| rs9996199    | TGTGGCCTGGCTAAAGTAGGCTTTA[ C/G ]TGGGCTCCTCTCTGCCTGCATCACC | C          | G           |

**SpCas9\_WT (PAM Motif: NRG)**

Ref. Allele:

CCGAGGAGAGACGGACG  
 TGTGGCCTGGCTAAAGTAGGCTTTA**C**TGGGCTCCTCTCTGCCTGCATCACC  
 ACACCGGACCGATTTTCATCCGAAAT**GAC**CCGAGGAGAGACGGACGTAGTGG  
**PAM**

Minor Allele

**PAM**  
 TGTGGCCTGGCTAAAGTAGGCTTT**TA**GTTGGGCTCCTCTCTGCCTGCATCACC  
 ACACCGGACCGATTTTCATCCGAAATC**A**CCCGAGGAGAGACGGACGTAGTGG  
 GGCCTGGCTAAAGTAGGCTT

---

| # Variant ID | Sequence Variation                                        | Ref.Allele | Min. allele |
|--------------|-----------------------------------------------------------|------------|-------------|
| rs28431418   | CTCCCCGCAGGGCTGTCCGGGTGAG[ C/T ]ATGGCTCTGGCCACGGGCCAGTGTG | C          | T           |

**SaCas9 (NNGRRT/NNGRR)**

Ref. Allele:

**PAM**  
 CTCCCCGCAGGGCTGTCCGGGTGAG**T**ATGGCTCTGGCCACGGGCCAGTGTG  
 GAGGGGCGTCCCACAGGCCCACTCATACCGAGACCGGTGCCCGGTACAC  
 TCCCCGCAGGGCTGTCCGG

Minor Allele

**PAM**  
 CTCCCCGCAGGGCTGTCCGGGTGAG**C**ATGGCTCTGGCCACGGGCCAGTGTG



GAGGGGCGTCCCACAGGCCACTCGTACCGAGACCGGTGCCCCGGTCACAC  
TCCCCGCAGGGCTGTCCGG

---

| # Variant ID | Sequence Variation                                        | Ref.Allele | Min. allele      |
|--------------|-----------------------------------------------------------|------------|------------------|
| rs2857935    | GGGCGCAGGCCCATGCGGAAAGGAT[A/C/G]CCCCGCCGACGCCTGGAGCGGGGCG | G          | C/T (Rev Strand) |

**SpCas9\_WT (PAM Motif: NRG)**

Ref. Allele:

GGCGGCTGCGGACCTCG  
GGGCGCAGGCCCATGCGGAAAGGATCCCCGCCGACGCCTGGAGCGGGGCG  
CCCCGCTCCGGGTACGCCTTTTCTAGGGGGCGGCTGCGGACCTCGCCCCGC  
**PAM**

Minor Allele

GGGCGCAGGCCCATGCGGAAAGGATGCCCCGCCGACGCCTGGAGCGGGGCG  
CCCCGCTCCGGGTACGCCTTTTCTACGGGGCGGCTGCGGACCTCGCCCCGC

**SpCas9\_VQR/EQR (PAM Motif: NGAN-NGNG/NGAG)**

Ref. Allele:

GGGGCGGCTGCGGACCTCG  
GGGCGCAGGCCCATGCGGAAAGGATCCCCGCCGACGCCTGGAGCGGGGCG  
CCCCGCTCCGGGTACGCCTTTTCTAGGGGGCGGCTGCGGACCTCGCCCCGC  
**PAM**

Minor Allele

GGGCGCAGGCCCATGCGGAAAGGATGCCCCGCCGACGCCTGGAGCGGGGCG  
CCCCGCTCCGGGTACGCCTTTTCTACGGGGCGGCTGCGGACCTCGCCCCGC

**SaCas9 (NNGRRT/NNGRR)**

Ref. Allele:

GGCTGCGGACCTCGCCCCG  
GGGCGCAGGCCCATGCGGAAAGGATCCCCGCCGACGCCTGGAGCGGGGCG  
CCCCGCTCCGGGTACGCCTTTTCTAGGGGGCGGCTGCGGACCTCGCCCCGC  
**PAM**

Minor Allele

GGCTGCGGACCTCGCCCCG  
GGGCGCAGGCCCATGCGGAAAGGATACCCCGCCGACGCCTGGAGCGGGGCG  
CCCCGCTCCGGGTACGCCTTTTCTATGGGGCGGCTGCGGACCTCGCCCCGC  
**PAM**

**LbCpf1 (TTN/TTCN/CTTN/TCTN/ATTN/TCCN/...):**

Ref. Allele:

**PAM**

GGGCGCAGGCCCATGCGGAAAGGATCCCCCGCCGACGCCTGGAGCGGGCG  
CCCGCGTCCGGGTACGCCTTTCCTAGGGGGCGGCTGCGGACCTCGCCCCG  
CCGCCGACGCCTGGAGCGGG

Minor Allele

GGGCGCAGGCCCATGCGGAAAGGATACCCCGCCGACGCCTGGAGCGGGCG  
CCCGCGTCCGGGTACGCCTTTCCTATGGGGCGGCTGCGGACCTCGCCCCG

---

| # Variant ID | Sequence Variation                                     |   | Ref.Allele | Min. allele |
|--------------|--------------------------------------------------------|---|------------|-------------|
| rs149624523  | CCCCGCCCCGGCCTCGCCACGCCCC[C/T]ACCTCACCACGCCCCCGCATCGCC | T | C          |             |

**SaCas9 (NNGRRT/NNGRR)**

Ref. Allele:

CCCCGCCCCGGCCTCGCCACGCCCCTACCTCACCACGCCCCCGCATCGCC  
GGGGCGGGGCCGGAGCGGTGCGGGGATGGAGTGGTGCGGGGGGCGTAGCGG

Minor Allele

GAGTGGTGCGGGGGGCGTAG  
CCCCGCCCCGGCCTCGCCACGCCCCCACCTCACCACGCCCCCGCATCGCC  
GGGGCGGGGCCGGAGCGGTGCGGGGATGGAGTGGTGCGGGGGGCGTAGCGG  
**PAM**

---

| # Variant ID | Sequence Variation                                      |   | Ref.Allele | Min. allele |
|--------------|---------------------------------------------------------|---|------------|-------------|
| rs13122415   | attacagtctcaccacgccccgtcc[C/G]CTCTCCGTTGAGCCCCGCGCCTTCG | C | G          |             |

**SpCas9\_WT (PAM Motif: NRG)**

Ref. Allele:

GAGGCAACTCGGGGCGCGG  
ATTACAGTCTCACCACGCCCCGTCCCCTCTCCGTTGAGCCCCGCGCCTTCG

TAATGTCAGAGTGGTGCGGGGCAGGGGAGAGGCAACTCGGGGCGCGGAAGC  
**PAM**

Minor Allele

ATTACAGTCTCACCACGCCCCGTCCGCTCTCCGTTGAGCCCCGCGCCTTCG  
TAATGTCAGAGTGGTGCGGGGCAGGGCAGAGGCAACTCGGGGCGCGGAAGC

**SpCas9\_VQR/EQR (PAM Motif: NGAN-NGNG/NGAG)**

Ref. Allele:

ATTACAGTCTCACCACGCCCCGTCCCTCTCCGTTGAGCCCCGCGCCTTCG  
TAATGTCAGAGTGGTGCGGGGCAGGGGAGAGGCAACTCGGGGCGCGGAAGC

Minor Allele

AGAGGCAACTCGGGGCG  
ATTACAGTCTCACCACGCCCCGTCCGCTCTCCGTTGAGCCCCGCGCCTTCG  
TAATGTCAGAGTGGTGCGGGGCAGGGCAGAGGCAACTCGGGGCGCGGAAGC  
**PAM**

**SpCas9\_VRER (PAM Motif: NGCG)**

Ref. Allele:

ATTACAGTCTCACCACGCCCCGTCCCTCTCCGTTGAGCCCCGCGCCTTCG  
TAATGTCAGAGTGGTGCGGGGCAGGGGAGAGGCAACTCGGGGCGCGGAAGC

Minor Allele

AGAGGCAACTCGGGGCG  
ATTACAGTCTCACCACGCCCCGTCCGCTCTCCGTTGAGCCCCGCGCCTTCG  
TAATGTCAGAGTGGTGCGGGGCAGGGCAGAGGCAACTCGGGGCGCGGAAGC  
**PAM**

**SaCas9 (NNGRRT/NNGRR)**

Ref. Allele:

GAGGCAACTCGGGGCG  
ATTACAGTCTCACCACGCCCCGTCCCTCTCCGTTGAGCCCCGCGCCTTCG  
TAATGTCAGAGTGGTGCGGGGCAGGGGAGAGGCAACTCGGGGCGCGGAAGC  
**PAM**

Minor Allele  
ATTACAGTCTCACCACGCCCCGTCCGCTCTCCGTTGAGCCCCGCGCCTTCG  
TAATGTCAGAGTGGTGCGGGGCAGGCGAGAGGCAACTCGGGGCGCGGAAGC

```
=====
# Variant ID      Sequence Variation      Ref.Allele      Min. allele
rs113331544      GGCCTTGCTGTGTGAGGCAGAACCT[-/GCGGGG]GCGGGGGCAGGGGCGGGCTGGTTCC      -      insGCGGGG
```

**SpCas9\_VQR/EQR (PAM Motif: NGAN-NGNG/NGAG)**

Ref. Allele:

**PAM**

GGCCTTGCTGTGTGAGGCAGAACCTGCGGGGGCAGGGGCGGGCTGGTTCC  
CCGGAACGACACACTCCGTCTTGGACGCCCCCGTCCCCGCCCGACCAAGG  
GCTGTGTGAGGCAGAACCT

Minor Allele

**PAM**

GGCCTTGCTGTGTGAGGCAGAACCTGCGGGGGCAGGGGCGGGCTGGTTCC  
CCGGAACGACACACTCCGTCTTGGACGCCCCCGTCCCCGCCCGACCAAGG  
GTGAGGCAGAACCTGCGGGG

**SpCas9\_VRER (PAM Motif: NGCG)**

Ref. Allele:

**PAM**

GGCCTTGCTGTGTGAGGCAGAACCTGCGGGGGCAGGGGCGGGCTGGTTCC  
CCGGAACGACACACTCCGTCTTGGACGCCCCCGTCCCCGCCCGACCAAGG  
GCTGTGTGAGGCAGAACCT

Minor Allele

**PAM**

GGCCTTGCTGTGTGAGGCAGAACCTGCGGGGGCAGGGGCGGGCTGGTTCC  
CCGGAACGACACACTCCGTCTTGGACGCCCCCGTCCCCGCCCGACCAAGG  
GTGAGGCAGAACCTGCGGGG

```
=====
# Variant ID      Sequence Variation      Ref.Allele      Min. allele
rs13132932      TGTGTGAGGCAGAACCTGCGGGGGC[A/G]GGGGCGGGCTGGTTCCCTGGCCAGC      A      G
```

**SpCas9\_VQR/EQR (PAM Motif: NGAN-NGNG/NGAG)**

Ref. Allele:  
 TGTGTGAGGCAGAACCTGCGGGGGCAGGGGCGGGCTGGTTCCTGGCCAGC  
 ACACACTCCGTCTTGGACGCCCCGTCCCCGCCGACCAAGGGACCGGTCG

Minor Allele  
**PAM**  
 TGTGTGAGGCAGAACCTGCGGGGGCAGGGGCGGGCTGGTTCCTGGCCAGC  
 ACACACTCCGTCTTGGACGCCCCGCCCGCCCGACCAAGGGACCGGTCG  
 GAGGCAGAACCTGCGGGG

**SpCas9\_VRER (PAM Motif: NGCG)**  
 Ref. Allele:  
 TGTGTGAGGCAGAACCTGCGGGGGCAGGGGCGGGCTGGTTCCTGGCCAGC  
 ACACACTCCGTCTTGGACGCCCCGTCCCCGCCGACCAAGGGACCGGTCG

Minor Allele  
**PAM**  
 TGTGTGAGGCAGAACCTGCGGGGGCAGGGGCGGGCTGGTTCCTGGCCAGC  
 ACACACTCCGTCTTGGACGCCCCGCCCGCCCGACCAAGGGACCGGTCG  
 GAGGCAGAACCTGCGGGG

**SaCas9 (NNGRRT/NGRR)**  
 Ref. Allele:  
 TGTGTGAGGCAGAACCTGCGGGGGCAGGGGCGGGCTGGTTCCTGGCCAGC  
 ACACACTCCGTCTTGGACGCCCCGTCCCCGCCGACCAAGGGACCGGTCG

Minor Allele  
**PAM**  
 TGTGTGAGGCAGAACCTGCGGGGGCAGGGGCGGGCTGGTTCCTGGCCAGC  
 ACACACTCCGTCTTGGACGCCCCGCCCGCCCGACCAAGGGACCGGTCG  
 GTGAGGCAGAACCTGCGGGG

---

| # Variant ID | Sequence Variation                                      |   | Ref.Allele | Min. allele |
|--------------|---------------------------------------------------------|---|------------|-------------|
| rs13102260   | AGCGTCTGGGACGCAAGGCGCCGTG[A/G]GGGCTGCCGGGACGGGTCCAAGATG | G | A          |             |

**SpCas9\_WT (PAM Motif: NRG)**  
 Ref. Allele:  
**PAM**

AGCGTCTGGGACGCAAGGCGCCGTGAGGGGCTGCCGGGACGGGTCCAAGATG  
TCGCAGACCCTGCGTTCCGCGGCACCCCCGACGGCCCTGCCCAGGTTCTAC  
GTCTGGGACGCAAGGCGCCG

Minor Allele

AGCGTCTGGGACGCAAGGCGCCGTGAGGGGCTGCCGGGACGGGTCCAAGATG  
TCGCAGACCCTGCGTTCCGCGGCACCTCCCGACGGCCCTGCCCAGGTTCTAC

**SpCas9\_VQR/EQR (PAM Motif: NGAN-NGNG/NGAG)**

Ref. Allele:

AGCGTCTGGGACGCAAGGCGCCGTGAGGGGCTGCCGGGACGGGTCCAAGATG  
TCGCAGACCCTGCGTTCCGCGGCACCCCCGACGGCCCTGCCCAGGTTCTAC

Minor Allele

**PAM**

AGCGTCTGGGACGCAAGGCGCCGTGAGGGGCTGCCGGGACGGGTCCAAGATG  
TCGCAGACCCTGCGTTCCGCGGCACCTCCCGACGGCCCTGCCCAGGTTCTAC  
GTCTGGGACGCAAGGCGCCG

**SaCas9 (NNGRRT/NNGRR)**

Ref. Allele:

**PAM**

AGCGTCTGGGACGCAAGGCGCCGTGAGGGGCTGCCGGGACGGGTCCAAGATG  
TCGCAGACCCTGCGTTCCGCGGCACCCCCGACGGCCCTGCCCAGGTTCTAC  
GCGTCTGGGACGCAAGGCGCCG

Minor Allele

AGCGTCTGGGACGCAAGGCGCCGTGAGGGGCTGCCGGGACGGGTCCAAGATG  
TCGCAGACCCTGCGTTCCGCGGCACCTCCCGACGGCCCTGCCCAGGTTCTAC

---

| # Variant ID | Sequence Variation                                     |   | Ref.Alele | Min. allele |
|--------------|--------------------------------------------------------|---|-----------|-------------|
| rs10009935   | CTCACTTGGGTCTTCCCTTGTCTC [C/T]CGCGAGGGGAGGCAGAGCCTTGTG | T | C         |             |

**SpCas9\_WT (PAM Motif: NRG)**

Ref. Allele:

CTCACTTGGGTCTTCCCTTGTCTCTCGCGAGGGGAGGCAGAGCCTTGTTG  
GAGTGAACCCAGAAGGGAACAGGAGAGCGCTCCCCTCCGTCTCGGAACAAC

Minor Allele

GCTCCCCTCCGTCTCGG  
CTCACTTGGGTCTTCCCTTGTCTCTCGCGAGGGGAGGCAGAGCCTTGTTG  
GAGTGAACCCAGAAGGGAACAGGAGGGCGCTCCCCTCCGTCTCGGAACAAC  
**PAM**

**SpCas9\_VQR/EQR (PAM Motif: NGAN-NGNG/NGAG)**

Ref. Allele:

CGCTCCCCTCCGTCTCGG  
CTCACTTGGGTCTTCCCTTGTCTCTCGCGAGGGGAGGCAGAGCCTTGTTG  
GAGTGAACCCAGAAGGGAACAGGAGGCGCTCCCCTCCGTCTCGGAACAAC  
**PAM**

Minor Allele

CTCACTTGGGTCTTCCCTTGTCTCTCGCGAGGGGAGGCAGAGCCTTGTTG  
GAGTGAACCCAGAAGGGAACAGGAGGGCGCTCCCCTCCGTCTCGGAACAAC

**SaCas9 (NNGRRT/NNGRR)**

Ref. Allele:

CTCACTTGGGTCTTCCCTTGTCTCTCGCGAGGGGAGGCAGAGCCTTGTTG  
GAGTGAACCCAGAAGGGAACAGGAGAGCGCTCCCCTCCGTCTCGGAACAAC

Minor Allele

GCTCCCCTCCGTCTCGGAA  
CTCACTTGGGTCTTCCCTTGTCTCTCGCGAGGGGAGGCAGAGCCTTGTTG  
GAGTGAACCCAGAAGGGAACAGGAGGGCGCTCCCCTCCGTCTCGGAACAAC  
**PAM**

---

| # Variant ID | Sequence Variation                                       | Ref. Allele | Min. allele |
|--------------|----------------------------------------------------------|-------------|-------------|
| rs58870770   | TGAATGAGTTGTGGTTGCCAAGTAA[-/A]GTGGTGAACCTTACGTGGTGATTAAT | A           | delA        |

**LbCpf1 (TTTN/TTCN/CTTN/TCTN/ATTN/TCCN/...):**

Ref. Allele:

CTTACTCAACACCAACGGTTC

TGAATGAGTTGTGGTTGCCAAGTAAAGTGGTGAACCTTACGTGGTGATTAAT  
ACTTACTCAACACCAACGGTTCATTTACCACCTTGAATGCACCACTAATTA

**PAM**

Minor Allele

TGAATGAGTTGTGGTTGCCAAGTAAGTGGTGAACCTTACGTGGTGATTAAT  
ACTTACTCAACACCAACGGTTCATTTACCACCTTGAATGCACCACTAATTA

**AsCpf1 (TTTN)**

Ref. Allele:

CTTACTCAACACCAACGGTTC  
TGAATGAGTTGTGGTTGCCAAGTAAAGTGGTGAACCTTACGTGGTGATTAAT  
ACTTACTCAACACCAACGGTTCATTTACCACCTTGAATGCACCACTAATTA

**PAM**

Minor Allele

TGAATGAGTTGTGGTTGCCAAGTAAGTGGTGAACCTTACGTGGTGATTAAT  
ACTTACTCAACACCAACGGTTCATTTACCACCTTGAATGCACCACTAATTA

---

| # Variant ID | Sequence Variation                                      |   | Ref.Allele | Min. allele |
|--------------|---------------------------------------------------------|---|------------|-------------|
| rs28571971   | ACAGTAGGAGTTAGGAAGTACTCTG[C/G]TGCAGTTCAGGCCTTTCTCTTACCT | G | C          |             |

**SpCas9\_WT (PAM Motif: NRG)**

Ref. Allele:

**PAM**

ACAGTAGGAGTTAGGAAGTACTCTGGTGCAGTTCAGGCCTTTCTCTTACCT  
TGTCATCCTCAATCCTTCATGAGACCACGTCAAGTCCGAAAGAGAATGGA  
GGAGTTAGGAAGTACTC

Minor Allele:

GTCAAGTCCGAAAGAGAATGG

ACAGTAGGAGTTAGGAAGTACTCTGCTGCAGTTCAGGCCTTTCTCTTACCT  
TGTCATCCTCAATCCTTCATGAGACGACGTCAAGTCCGAAAGAGAATGGA

**PAM**

---

| # Variant ID | Sequence Variation                                      |  | Ref.Allele | Min. allele |
|--------------|---------------------------------------------------------|--|------------|-------------|
| rs28583447   | CAGTAGGAGTTAGGAAGTACTCTGG[C/T]GCAGTTCAGGCCTTTCTCTTACCTC |  | T          | C           |



**SpCas9\_VQR/EQR (PAM Motif: NGAN-NGNG/NGAG)**

Ref. Allele:

CAGTAGGAGTTAGGAAGTACTCTGGTGCAGTTCAGGCCTTTCTTTACCTC  
GTCATCCTCAATCCTTCATGAGACCACGTCAAGTCCGGAAAGAGAATGGAG

Minor Allele:

TCAAGTCCGGAAAGAGAATG

CAGTAGGAGTTAGGAAGTACTCTGGCGCAGTTCAGGCCTTTCTTTACCTC  
GTCATCCTCAATCCTTCATGAGACCCGTCAAGTCCGGAAAGAGAATGGAG

**PAM**

**SpCas9\_VRER (PAM Motif: NGCG)**

Ref. Allele:

CAGTAGGAGTTAGGAAGTACTCTGGTGCAGTTCAGGCCTTTCTTTACCTC  
GTCATCCTCAATCCTTCATGAGACCACGTCAAGTCCGGAAAGAGAATGGAG

Minor Allele:

**PAM**

CAGTAGGAGTTAGGAAGTACTCTGGCGCAGTTCAGGCCTTTCTTTACCTC  
GTCATCCTCAATCCTTCATGAGACCCGTCAAGTCCGGAAAGAGAATGGAG

GGAGTTAGGAAGTACTCTG

Minor Allele:

TCAAGTCCGGAAAGAGAATG

CAGTAGGAGTTAGGAAGTACTCTGGCGCAGTTCAGGCCTTTCTTTACCTC  
GTCATCCTCAATCCTTCATGAGACCCGTCAAGTCCGGAAAGAGAATGGAG

**PAM**

---

| # Variant ID | Sequence Variation                                      | Ref.Allele | Min. allele |
|--------------|---------------------------------------------------------|------------|-------------|
| rs28468636   | TCTCTTACCTCTCAGTATTCTATTT[C/G]CGATCTGGATGTGTCCCAGATGGCA | C          | G           |

**SpCas9\_WT (PAM Motif: NRG)**

Ref. Allele:

TAGACCTACACAGGGTCTA

TCTCTTACCTCTCAGTATTCTATTTCCGATCTGGATGTGTCCCAGATGGCA  
AGAGAATGGAGAGTCATAAGATAAAGGCTAGACCTACACAGGGTCTACCGT

**PAM**

Minor Allele

TCTCTTACCTCTCAGTATTCTATTTCCGATCTGGATGTGTCCCAGATGGCA

AGAGAATGGAGAGTCATAAGATAAACGCTAGACCTACACAGGGTCTACCGT

**SpCas9\_VQR/EQR (PAM Motif: NGAN-NGNG/NGAG)**

Ref. Allele:

TCTCTTACCTCTCAGTATTCTATTTCCGATCTGGATGTGTCCCAGATGGCA  
AGAGAATGGAGAGTCATAAGATAAAGGCTAGACCTACACAGGGTCTACCGT

Minor Allele

**PAM**

TCTCTTACCTCTCAGTATTCTATTTCCGATCTGGATGTGTCCCAGATGGCA  
AGAGAATGGAGAGTCATAAGATAAACGCTAGACCTACACAGGGTCTACCGT  
ACCTCTCAGTATTCTATTT

**SpCas9\_VRER (PAM Motif: NGCG)**

Ref. Allele:

TCTCTTACCTCTCAGTATTCTATTTCCGATCTGGATGTGTCCCAGATGGCA  
AGAGAATGGAGAGTCATAAGATAAAGGCTAGACCTACACAGGGTCTACCGT

Minor Allele

**PAM**

TCTCTTACCTCTCAGTATTCTATTTCCGATCTGGATGTGTCCCAGATGGCA  
AGAGAATGGAGAGTCATAAGATAAACGCTAGACCTACACAGGGTCTACCGT  
ACCTCTCAGTATTCTATTT

**SaCas9 (NNGRRT/NGRR) :**

Ref. Allele:

TAGACCTACACAGGGTCTA

TCTCTTACCTCTCAGTATTCTATTTCCGATCTGGATGTGTCCCAGATGGCA  
AGAGAATGGAGAGTCATAAGATAAAGGCTAGACCTACACAGGGTCTACCGT

**PAM**

Minor Allele

TCTCTTACCTCTCAGTATTCTATTTCCGATCTGGATGTGTCCCAGATGGCA  
AGAGAATGGAGAGTCATAAGATAAACGCTAGACCTACACAGGGTCTACCGT

**LbCpf1 (TTN/TTCN/CTTN/TCTN/ATTN/TCCN/...) :**

Ref. Allele:

**PAM**

TCTCTTACCTCTCAGTATTCTATTTCCGATCTGGATGTGTCCCAGATGGCA  
AGAGAATGGAGAGTCATAAGATAAAGGCTAGACCTACACAGGGTCTACCGT

ATCTGGATGTGTCCCAGATG

Minor Allele

TCTCTTACCTCTCAGTATTCTATTTGCGATCTGGATGTGTCCCAGATGGCA  
AGAGAATGGAGAGTCATAAGATAAACGCTAGACCTACACAGGGTCTACCGT

---

| # Variant ID | Sequence Variation                                     |   | Ref.Allele | Min. allele |
|--------------|--------------------------------------------------------|---|------------|-------------|
| rs28564368   | TATTCTATTTCCGATCTGGATGTGT[A/C]CCAGATGGCATTGGTAAGAATATC | C | A          |             |

**SpCas9\_WT (PAM Motif: NRG)**

Ref. Allele: TCTACCGTAAACCATTCTTA  
TATTCTATTTCCGATCTGGATGTGTCCAGATGGCATTGGTAAGAATATC  
ATAAGATAAAGGCTAGACCTACACAGGGTCTACCGTAAACCATTCTTATAG  
**PAM**

Minor Allele

TATTCTATTTCCGATCTGGATGTGTACCAGATGGCATTGGTAAGAATATC  
ATAAGATAAAGGCTAGACCTACACATGGTCTACCGTAAACCATTCTTATAG

**SpCas9\_VQR/EQR (PAM Motif: NGAN-NGNG/NGAG)**

Ref. Allele: GTCTACCGTAAACCATTCTT  
TATTCTATTTCCGATCTGGATGTGTCCAGATGGCATTGGTAAGAATATC  
ATAAGATAAAGGCTAGACCTACACAGGGTCTACCGTAAACCATTCTTATAG  
**PAM**

Minor Allele

TATTCTATTTCCGATCTGGATGTGTACCAGATGGCATTGGTAAGAATATC  
ATAAGATAAAGGCTAGACCTACACATGGTCTACCGTAAACCATTCTTATAG

Ref. Allele: TCTACCGTAAACCATTCTTA  
TATTCTATTTCCGATCTGGATGTGTCCAGATGGCATTGGTAAGAATATC  
ATAAGATAAAGGCTAGACCTACACAGGGTCTACCGTAAACCATTCTTATAG  
**PAM**

Minor Allele

TATTCTATTTCCGATCTGGATGTGTACCAGATGGCATTGGTAAGAATATC  
ATAAGATAAAGGCTAGACCTACACATGGTCTACCGTAAACCATTCTTATAG

**LbCpf1 (TTN/TTCN/CTTN/TCTN/ATTN/TCCN/...):**

Ref. Allele: **PAM**  
TATTCTATTTCCGATCTGGATGTGTCCAGATGGCATTGGTAAGAATATC  
ATAAGATAAAGGCTAGACCTACACAGGGTCTACCGTAAACCATTCTTATAG

AGATGGCATTGGTAAGAATAT

Minor Allele

TATTCTATTTCCGATCTGGATGTGTACCAGATGGCATTGGTAAGAATATC  
ATAAGATAAAGGCTAGACCTACACATGGTCTACCGTAAACCATTCTTATAG

---

| # Variant ID | Sequence Variation                                      | Ref.Allele | Min. allele |
|--------------|---------------------------------------------------------|------------|-------------|
| rs77173925   | GAATAAATTATTCTAAAGGATGGAA[A/G]AACTTTTTGGATATTTGGAGAAATT | A          | G           |

**SpCas9\_WT (PAM Motif: NRG)**

Ref. Allele:

GAATAAATTATTCTAAAGGATGGAAAACTTTTTGGATATTTGGAGAAATT  
CTTATTTAATAAGATTTTCTACCTTTTTGAAAAACCTATAAACCTCTTTAA

Minor Allele

**PAM**

GAATAAATTATTCTAAAGGATGGAAGAACTTTTTGGATATTTGGAGAAATT  
CTTATTTAATAAGATTTTCTACCTTTGAAAAACCTATAAACCTCTTTAA  
AAATTATTCTAAAGGATGG

**SpCas9\_VQR/EQR (PAM Motif: NGAN-NGNG/NGAG)**

Ref. Allele:

GAATAAATTATTCTAAAGGATGGAAAACTTTTTGGATATTTGGAGAAATT  
CTTATTTAATAAGATTTTCTACCTTTTTGAAAAACCTATAAACCTCTTTAA

Minor Allele

**PAM**

GAATAAATTATTCTAAAGGATGGAAGAACTTTTTGGATATTTGGAGAAATT  
CTTATTTAATAAGATTTTCTACCTTTGAAAAACCTATAAACCTCTTTAA  
ATTATTCTAAAGGATGGAA

**SaCas9 (NNGRRT/NNGRR) :**

Ref. Allele:

GAATAAATTATTCTAAAGGATGGAAAACTTTTTGGATATTTGGAGAAATT  
CTTATTTAATAAGATTTTCTACCTTTTTGAAAAACCTATAAACCTCTTTAA

Minor Allele

**PAM**

GAATAAATTATTCTAAAGGATGGAAGAACTTTTTGGATATTTGGAGAAATT  
CTTATTTAATAAGATTTTCTACCTTTGAAAAACCTATAAACCTCTTTAA  
AATTATTCTAAAGGATGG

**AsCpf1 (TTTN)**

Ref. Allele:

ATTTAATAAGATTTTCCTACC  
GAATAAATTATTCTAAAGGATGGAAAACTTTTTGGATATTTGGAGAAATT  
CTTATTTAATAAGATTTTCCTACCTTTTTGAAAAACCTATAAACCTCTTTAA  
**PAM**

Minor Allele

GAATAAATTATTCTAAAGGATGGAAAGAACTTTTTGGATATTTGGAGAAATT  
CTTATTTAATAAGATTTTCCTACCTTCTTGAAAAACCTATAAACCTCTTTAA

---

| # Variant ID | Sequence Variation                                     | Ref.Allele | Min. allele    |
|--------------|--------------------------------------------------------|------------|----------------|
| rs3905238    | TTGTATCATGTCAATGTACTTA[C/T]GCAAAAATAATACATTAATAAAAAAAT | A          | G (Rev Strand) |

**SpCas9\_VQR/EQR (PAM Motif: NGAN-NGNG/NGAG)**

Ref. Allele:

TTGTATCATGTCAATGTACTTTAAGCAAAAATAATACATTAATAAAAAAAT  
AACATAGTACAGTTACATAATGAATACGTTTTTATTATGTAATTTTTTTTTA

Minor Allele

TTTTATTATGTAATTTTTT  
TTGTATCATGTCAATGTACTTTAAGCAAAAATAATACATTAATAAAAAAAT  
AACATAGTACAGTTACATAATGAATGCGTTTTTATTATGTAATTTTTTTTTA  
**PAM**

**SpCas9\_VRER (PAM Motif: NGCG)**

Ref. Allele:

TTGTATCATGTCAATGTACTTTAAGCAAAAATAATACATTAATAAAAAAAT  
AACATAGTACAGTTACATAATGAATACGTTTTTATTATGTAATTTTTTTTTA

Minor Allele

TTTTATTATGTAATTTTTT  
TTGTATCATGTCAATGTACTTTAAGCAAAAATAATACATTAATAAAAAAAT  
AACATAGTACAGTTACATAATGAATGCGTTTTTATTATGTAATTTTTTTTTA  
**PAM**

---

| # Variant ID | Sequence Variation                                         | Ref.Allele | Min. allele |
|--------------|------------------------------------------------------------|------------|-------------|
| rs33950430   | AGGTATTCACTAATTTTGAGTAACA[-/AACA]CTGCTCACAAAGTTTGGATTTTGGC | AACA       | delAACA     |

**LbCpf1 (TTN/TTCN/CTTN/TCTN/ATTN/TCCN/...):**

Ref. Allele:

ATAAGTGATTAAAACCTCATT  
 AGGTATTCACTAATTTTGAGTAACA**AACA**CTGCTCACAAAGTTTGGATTTTGGC  
 TCCATAAGTGATTAAAACCTCATTGTTTGTGACGAGTGTTTCAAACCTAAAACCG  
**PAM**

Minor Allele

AGGTATTCACTAATTTTGAGTAACACTGCTCACAAAGTTTGGATTTTGGC  
 TCCATAAGTGATTAAAACCTCATTGTGACGAGTGTTTCAAACCTAAAACCG

**AsCpf1 (TTN)**

Ref. Allele:

ATAAGTGATTAAAACCTCATT  
 AGGTATTCACTAATTTTGAGTAACA**AACA**CTGCTCACAAAGTTTGGATTTTGGC  
 TCCATAAGTGATTAAAACCTCATTGTTTGTGACGAGTGTTTCAAACCTAAAACCG  
**PAM**

Minor Allele

AGGTATTCACTAATTTTGAGTAACACTGCTCACAAAGTTTGGATTTTGGC  
 TCCATAAGTGATTAAAACCTCATTGTGACGAGTGTTTCAAACCTAAAACCG

| # Variant ID | Sequence Variation                                      | Ref.Allele | Min. allele |
|--------------|---------------------------------------------------------|------------|-------------|
| rs28377140   | AGGCAATTAATACTTGCTTCTGGCA[C/G]TTTCTTATTCTCCTTCAGATTCCTA | G          | C           |

**SpCas9\_WT (PAM Motif: NRG)**

Ref. Allele: **PAM**

AGGCAATTAATACTTGCTTCTGGCA**G**TTTCTTATTCTCCTTCAGATTCCTA  
 TCCGTTAATTATGAACGAAGACCGTCAAAGAATAAGAGGAAGTCTAAGGAT  
 ATTAATACTTGCTTCTGG

Minor Allele

AGAATAAGAGGAAGTCTAAGG

AGGCAATTAATACTTGCTTCTGGCACCTTTCTTATTCTCCTTCAGATTCCTA  
 TCCGTTAATTATGAACGAAGACCGTGAAAGAATAAGAGGAAGTCTAAGGAT

**PAM**

```
=====
```

| # Variant ID | Sequence Variation                                       |   | Ref.Allele     | Min. allele |
|--------------|----------------------------------------------------------|---|----------------|-------------|
| rs3856973    | ttaaaaataaaaaataaGTTAACACT[C/T]GATTAACCCTGACATTTCCCTATCC | G | A (Rev strand) |             |

**SpCas9\_VQR/EQR (PAM Motif: NGAN-NGNG/NGAG)**

Ref. Allele: CTAATTGGGACTGTAAAGGG  
 TTAAAAATAAAAAATAAGTTAACACTCGATTAACCCTGACATTTCCCTATCC  
 AATTTTTATTTTTATTCAATTGTGAGCTAATTGGGACTGTAAAGGGATAGG

**PAM**

Minor Allele  
 TTAAAAATAAAAAATAAGTTAACACTTGATTAACCCTGACATTTCCCTATCC  
 AATTTTTATTTTTATTCAATTGTGAACTAATTGGGACTGTAAAGGGATAGG

**SaCas9 (NNGRRT/NNGRR) :**

Ref. Allele: AATTGGGACTGTAAAGGG  
 TTAAAAATAAAAAATAAGTTAACACTCGATTAACCCTGACATTTCCCTATCC  
 AATTTTTATTTTTATTCAATTGTGAGCTAATTGGGACTGTAAAGGGATAGG

**PAM**

Minor Allele  
 TTAAAAATAAAAAATAAGTTAACACTTGATTAACCCTGACATTTCCCTATCC  
 AATTTTTATTTTTATTCAATTGTGAACTAATTGGGACTGTAAAGGGATAGG

**LbCpf1 (TTTN/TTCN/CTTN/TCTN/ATTN/TCCN/...) :**

Ref. Allele:  
 TTAAAAATAAAAAATAAGTTAACACTCGATTAACCCTGACATTTCCCTATCC  
 AATTTTTATTTTTATTCAATTGTGAGCTAATTGGGACTGTAAAGGGATAGG

Minor Allele **PAM**

TTAAAAATAAAAAATAAGTTAACACTTGATTAACCCTGACATTTCCCTATCC  
 AATTTTTATTTTTATTCAATTGTGAACTAATTGGGACTGTAAAGGGATAGG  
 ATTAACCCTGACATTTCCCTA

```
=====
```

| # Variant ID | Sequence Variation |  | Ref.Allele | Min. allele |
|--------------|--------------------|--|------------|-------------|
|--------------|--------------------|--|------------|-------------|

rs4498089 AGTGTTAACTTATTTTTATTTTTAA[A/G]AAAATTGTTAAGGGCTTTCCAGCAA A G

**SpCas9\_WT (PAM Motif: NRG)**

Ref. Allele:

AGTGTTAACTTATTTTTATTTTTAAAAAAATTGTTAAGGGCTTTCCAGCAA  
TCACAATTGAATAAAAAATAAAAATTTTTTTAACAATTCCCGAAAGGTCGTT

Minor Allele **PAM**

AGTGTTAACTTATTTTTATTTTTAAGAAAATTGTTAAGGGCTTTCCAGCAA  
TCACAATTGAATAAAAAATAAAAATTTCTTTTAACAATTCCCGAAAGGTCGTT  
GTTAACTTATTTTTATTTTT

**SpCas9\_VQR/EQR (PAM Motif: NGAN-NGNG/NGAG)**

Ref. Allele:

AGTGTTAACTTATTTTTATTTTTAAAAAAATTGTTAAGGGCTTTCCAGCAA  
TCACAATTGAATAAAAAATAAAAATTTTTTTAACAATTCCCGAAAGGTCGTT

Minor Allele **PAM**

AGTGTTAACTTATTTTTATTTTTAAGAAAATTGTTAAGGGCTTTCCAGCAA  
TCACAATTGAATAAAAAATAAAAATTTCTTTTAACAATTCCCGAAAGGTCGTT  
GTTAACTTATTTTTATTTTTA

**SaCas9 (NNGRRT/NNGRR) :**

Ref. Allele:

AGTGTTAACTTATTTTTATTTTTAAAAAAATTGTTAAGGGCTTTCCAGCAA  
TCACAATTGAATAAAAAATAAAAATTTTTTTAACAATTCCCGAAAGGTCGTT

Minor Allele **PAM**

AGTGTTAACTTATTTTTATTTTTAAGAAAATTGTTAAGGGCTTTCCAGCAA  
TCACAATTGAATAAAAAATAAAAATTTCTTTTAACAATTCCCGAAAGGTCGTT  
GTTAACTTATTTTTATTTTT

**AsCpf1 (TTTN)**

Ref. Allele:

CACAATTGAATAAAAAATAAAA  
AGTGTTAACTTATTTTTATTTTTAAAAAAATTGTTAAGGGCTTTCCAGCAA  
TCACAATTGAATAAAAAATAAAAATTTTTTTAACAATTCCCGAAAGGTCGTT



**PAM**

Minor Allele

AGTGTTAACTTATTTTTATTTTTAAAGAAAATTGTTAAGGGCTTTCCAGCAA  
TCACAATTGAATAAAAATAAAAATTCTTTTAAACAATTCCTCGAAAGGTCGTT

---

| # Variant ID | Sequence Variation                                      |   | Ref.Allele | Min. allele |
|--------------|---------------------------------------------------------|---|------------|-------------|
| rs57666989   | CTGCAAGCTCCGCTTCCCGAGTTCA[C/T]GCCATTCTCCTGCCTCAGTCTCCCA | C | T          |             |

**SpCas9\_VQR/EQR (PAM Motif: NGAN-NGNG/NGAG)**

Ref. Allele: TAAGAGGACGGAGTCAGAGGG  
CTGCAAGCTCCGCTTCCCGAGTTCAAGCCATTCTCCTGCCTCAGTCTCCCA  
GACGTTTCGAGGCGAAGGGCTCAAGTGCGGTAAGAGGACGGAGTCAGAGGGT

**PAM**

Minor Allele

CTGCAAGCTCCGCTTCCCGAGTTCAAGCCATTCTCCTGCCTCAGTCTCCCA  
GACGTTTCGAGGCGAAGGGCTCAAGTACGGTAAGAGGACGGAGTCAGAGGGT

**SpCas9\_VRER (PAM Motif: NGCG)**

Ref. Allele: TAAGAGGACGGAGTCAGAGG  
CTGCAAGCTCCGCTTCCCGAGTTCAAGCCATTCTCCTGCCTCAGTCTCCCA  
GACGTTTCGAGGCGAAGGGCTCAAGTGCGGTAAGAGGACGGAGTCAGAGGGT

**PAM**

Minor Allele

CTGCAAGCTCCGCTTCCCGAGTTCAAGCCATTCTCCTGCCTCAGTCTCCCA  
GACGTTTCGAGGCGAAGGGCTCAAGTACGGTAAGAGGACGGAGTCAGAGGGT

---

| # Variant ID | Sequence Variation                                    |   | Ref.Allele | Min. allele |
|--------------|-------------------------------------------------------|---|------------|-------------|
| rs10006129   | tcttgatctcctgacctcgtcatcc[C/G]ccgaccttgatccgcccacctcg | G | C          |             |

**SpCas9\_WT (PAM Motif: NRG)**

Ref. Allele: TCTTGATCTCCTGACCTCGTCATCCGCCGACCTTGTGATCCGCCCACCTCG  
AGAACTAGAGGACTGGAGCAGTAGGCGGCTGGAACACTAGGCGGGTGGAGC

Minor Allele CTGGAACACTAGGCGGGTGG  
TCTTGATCTCCTGACCTCGTCATCC**CCG**ACCTTGTGATCCGCCACCTCG  
AGAACTAGAGGACTGGAGCAGTAGGGGGCTGGAACACTAGGCGGGTGGAGC  
**PAM**

**SpCas9\_VQR/EQR (PAM Motif: NGAN-NGNG/NGAG)**

Ref. Allele:  
TCTTGATCTCCTGACCTCGTCATCC**CCG**ACCTTGTGATCCGCCACCTCG  
AGAACTAGAGGACTGGAGCAGTAGGGGGCTGGAACACTAGGCGGGTGGAGC

Minor Allele CTGGAACACTAGGCGGGTGG  
TCTTGATCTCCTGACCTCGTCATCC**CCG**ACCTTGTGATCCGCCACCTCG  
AGAACTAGAGGACTGGAGCAGTAGGGGGCTGGAACACTAGGCGGGTGGAGC  
**PAM**

**SpCas9\_VRER (PAM Motif: NGCG)**

Ref. Allele: CTGGAACACTAGGCGGGTGG  
TCTTGATCTCCTGACCTCGTCATCC**CCG**ACCTTGTGATCCGCCACCTCG  
AGAACTAGAGGACTGGAGCAGTAGGGGGCTGGAACACTAGGCGGGTGGAGC  
**PAM**

Minor Allele  
TCTTGATCTCCTGACCTCGTCATCC**CCG**ACCTTGTGATCCGCCACCTCG  
AGAACTAGAGGACTGGAGCAGTAGGGGGCTGGAACACTAGGCGGGTGGAGC

**SaCas9 (NNGRRT/NNGRR) :**

Ref. Allele:  
TCTTGATCTCCTGACCTCGTCATCC**CCG**ACCTTGTGATCCGCCACCTCG  
AGAACTAGAGGACTGGAGCAGTAGGGGGCTGGAACACTAGGCGGGTGGAGC

Minor Allele CTGGAACACTAGGCGGGTGG  
TCTTGATCTCCTGACCTCGTCATCC**CCG**ACCTTGTGATCCGCCACCTCG  
AGAACTAGAGGACTGGAGCAGTAGGGGGCTGGAACACTAGGCGGGTGGAGC  
**PAM**

=====

| # Variant ID | Sequence Variation                                      |   | Ref.Allele | Min. allele |
|--------------|---------------------------------------------------------|---|------------|-------------|
| rs28696693   | GGTAATTTTTGTATTTTTAGTAGAG[A/G]TGGGGTTTTGCCATGATGAGCAGGC | A | G          |             |

**SpCas9 (PAM Motif: NRG)**

Ref. Allele:

GGTAATTTTTGTATTTTTAGTAGAGATGGGGTTTTGCCATGATGAGCAGGC  
 CCATTA AAAACATAAAAATCATCTCTACCCCAAACGGTACTACTCGTCCG

Minor Allele

**PAM**

GGTAATTTTTGTATTTTTAGTAGAGGTGGGGTTTTGCCATGATGAGCAGGC  
 CCATTA AAAACATAAAAATCATCTCTACCCCAAACGGTACTACTCGTCCG  
 ATTTTTGTATTTTTAGTAG

**SpCas9\_VQR/EQR (PAM Motif: NGAN-NGNG/NGAG)**

Ref. Allele:

**PAM**

GGTAATTTTTGTATTTTTAGTAGAGATGGGGTTTTGCCATGATGAGCAGGC  
 CCATTA AAAACATAAAAATCATCTCTACCCCAAACGGTACTACTCGTCCG  
 TTTTTGTATTTTTAGTAG

Minor Allele

GGTAATTTTTGTATTTTTAGTAGAGGTGGGGTTTTGCCATGATGAGCAGGC  
 CCATTA AAAACATAAAAATCATCTCCACCCCAAACGGTACTACTCGTCCG

---

| # Variant ID | Sequence Variation                                      |   | Ref.Allele | Min. allele |
|--------------|---------------------------------------------------------|---|------------|-------------|
| rs28393280   | GGATTTTGAATGCGGAACCAACTGC[A/G]CTTGTTGAACTCTGCTAAGTATAAC | A | G          |             |

**SpCas9\_VQR/EQR (PAM Motif: NGAN-NGNG/NGAG)**

Ref. Allele:

GGATTTTGAATGCGGAACCAACTGCCTTGTTGAACTCTGCTAAGTATAAC  
 CCTAAAACCTTACGCCTTGGTTGACGTGAACAACCTTGAGACGATTTCATATTG

Minor Allele:

**PAM**

GGATTTTGAATGCGGAACCAACTGCGCTTGTTGAACTCTGCTAAGTATAAC  
 CCTAAAACCTTACGCCTTGGTTGACGCGAACAACCTTGAGACGATTTCATATTG

ATTTTGAATGCGGAACCAAC

**SpCas9\_VRER (PAM Motif: NGCG)**

Ref. Allele:

GGATTTTGAATGCGGAACCAACTGC<sup>A</sup>CTTGTGAACTCTGCTAAGTATAAC  
CCTAAAACCTTACGCCTTGTTGACGTGAACAACCTTGAGACGATTCATATTG

Minor Allele: **PAM**

GGATTTTGAATGCGGAACCAACTGC<sup>G</sup>CTTGTGAACTCTGCTAAGTATAAC  
CCTAAAACCTTACGCCTTGTTGACGCGAACAACCTTGAGACGATTCATATTG  
ATTTTGAATGCGGAACCAAC

Minor Allele: **ACA**ACTTGAGACGATTCAT

GGATTTTGAATGCGGAACCAACTGC<sup>G</sup>CTTGTGAACTCTGCTAAGTATAAC  
CCTAAAACCTTACGCCTTGTTGACGCGAACAACCTTGAGACGATTCATATTG  
**PAM**

**Figure S2:** List of sgRNA sequences designed targeting prevalent SNP-dependent PAM upstream *HTT* exon-1, and within *HTT* intron-1.

**sgRNA sequences targeting SNP-dependent PAM:**

**Sequence sgHD1**

Complementary guide: 5'GCTCCAGGCGTCGGCGG 3' (sgHD1) (n=17 nt)  
sgRNA expression cassette: hU6 promoter

Major Allele (C): Have a PAM motif on the Positive strand (NGG)  
GTCGCCCCGCTCCAGGCGTCGGCGG**GGG**ATCCTTTCCGCATGGGCCTGCGCC  
CAGCGGGGCGAGGTCCGCAGCCGCC**CCCT**AGGAAAGGCGTACCCGGACGCGG  
GCTCCAGGCGTCGGCGG

Minor Allele (G): Disruption of the PAM motive.  
GTCGCCCCGCTCCAGGCGTCGGCGGG**G**ATCCTTTCCGCATGGGCCTGCGCC  
CAGCGGGGCGAGGTCCGCAGCCGCC**CT**AGGAAAGGCGTACCCGGACGCGG

**Sequence sgHD2**

Complementary guide: 5'GGCGCGGGGCTCAACGGAG 3' (sgHD2) (n=19 nt)  
sgRNA expression cassette: hU6 promoter

Major Allele (C): Has a PAM motif on the Negative strand (NGG)  
GAGGCAACTCGGGGCGCGG  
TTACAGTCTCACCACGCCCCGTCC**CT**CTCCGTTGAGCCCCGCGCCTTC  
AATGTCAGAGTGGTGCGGGGCAGG**GGA**GAGGCAACTCGGGGCGCGGAAG

Minor Allele (G): Disruption of the PAM motive  
TTACAGTCTCACCACGCCCCGTCC**G**CTCTCCGTTGAGCCCCGCGCCTTC  
AATGTCAGAGTGGTGCGGGGCAGG**CT**GAGAGGCAACTCGGGGCGCGGAAG

### Sequence sgHD3

Complementary guide: 5'GTCTGGGACGCAAGGCGCCG3' (sgHD3) (n=20 nt)  
sgRNA expression cassette: hU6 promoter

Major Allele (G): Has a PAM motif on the Positive strand (NGG) Use U6 promoter  
GCGTCTGGGACGCAAGGCGCCG**TGG**GGGCTGCCGGGACGGGTCCAAGAT  
CGCAGACCCTGCGTTCCGCGGCACC**CCCG**ACGGCCCTGCCCAGGTTCTA  
GTCTGGGACGCAAGGCGCCG

Minor Allele (A): Loss PAM motif on the Positive strand (NGG) Use U6 promoter  
GCGTCTGGGACGCAAGGCGCCGT**G**GGGCTGCCGGGACGGGTCCAAGAT  
CGCAGACCCTGCGTTCCGCGGCAC**T**CCCGACGGCCCTGCCCAGGTTCTA

### Sequence sgHD4

Complementary guide: 5' GATGCACGCGGGGTGGGGC 3' (n=19 nt)  
sgRNA expression cassette: hU6 promoter

Major Allele: Has a PAM motif on the negative strand (NGG))

3' CGGGGTGGGGCGCACGTAG 5'  
5' TCTGCGTCAGGGTTTCCTTCTTTT**C**CAGCCCCACCCCGCGTGCATCCCA 3'  
3' AGACGCAGTCCCAAAGGAAGAAA**AGGT**CGGGGTGGGGCGCACGTAGGGT 5'

Minor Allele: SNP produces a Loss of the PAM motif.

5' TCTGCGTCAGGGTTTCCTTCTTTT**G**CAGCCCCACCCCGCGTGCATCCCA 3'  
3' AGACGCAGTCCCAAAGGAAGAAA**C**GTCGGGGTGGGGCGCACGTAGGGT

### Sequence sgHD5g and sgHD5c

Complementary guide: 5'ATTCAGGTTGATGTCCT 3' (sgHD5g) (n=17 nt)

Complementary guide: 5'ATCCATTCTGAGGTTCTGG 3 (sgHD5c) (n=20 nt)

sgRNA expression cassette: hH1 promoter

Major Allele: Has a PAM motif on the Positive strand (NAG)

5'CCCTCATTGAGGTTGATGTCCTAAGCCCCAGAACCTCAGAATGGGATTG 3'

3' GGGAGTAAGTCCAACACTACAGGATTCGGGGTCTTGGAGTCTTACCCTAAC 5'

ATTCAGGTTGATGTCCT

Minor Allele: generates a PAM motif on the Negative strand (NAG)

GGTCTTGGAGTCTTACCCTA

5'CCCTCATTGAGGTTGATGTCCTAACCCCCAGAACCTCAGAATGGGATTG 3'

3'GGGAGTAAGTCCAACACTACAGGATTGGGGTCTTGGAGTCTTACCCTAAC 5'

### Sequence sgHD6c and sgHD6g

Complementary guide: 5'GCAGGCAGAGAGGAGCC 3' (sgHD6c) (n=17 nt)

Complementary guide: 5'GCCTGGCTAAAGTAGGCTT 3 (sgHD6g) (n=19 nt)

sgRNA expression cassette: hU6 promoter

Major Allele (C): Have a PAM motif on the negative strand (NAG)

CCGAGGAGAGACGGACG

5' GTGGCCTGGCTAAAGTAGGCTTTACTGGGCTCCTCTCTGCCTGCATCAC 3'

3' CACCGGACCGATTTTCATCCGAAATGACCCGAGGAGAGACGGACGTAGTG 5'

Minor Allele (G): Generates a PAM motif on the Positive strand (NAG)

5' GTGGCCTGGCTAAAGTAGGCTTTAGTGGGCTCCTCTCTGCCTGCATCAC 3'

3' CACCGGACCGATTTTCATCCGAAATCACCGGAGGAGAGACGGACGTAGTG 5'  
GCCTGGCTAAAGTAGGCTT

**Sequence sgHdi3**

Complementary guide: 5'GCTTTTAGGACGCCTCGG 3' (sgHdi3) (n=18 nt)  
sgRNA expression cassette: hU6 promoter

5' AATGCTTTTAGGACGCCTCGGCGGAGTGGCGGGGCAGGGGGGGGGCG 3  
3' TTACGAAAATCCTGCGGAGCCGCCCTCACCGCCCCGTCCCCCCCCCGC 5'  
GCTTTTAGGACGCCTCGG

**Sequence sgHdi4**

Complementary guide: 5' GCGGGACACTTCGAGAGG 3' (sgHdi4) (n=18 nt)  
sgRNA expression cassette: hU6 promoter

5' GGCGCGGGACACTTCGAGAGGAGGCGGGGTTTGGAGCTGGAGAGATGT 3'  
3' CCGGCCCTGTGAAGCTCTCCTCCGCCCAAACCTCGACCTCTCTACA 5'  
GCGGGACACTTCGAGAGG



**Supplementary Figure 3:** Efficacy of SNP-dependent sgHD/SpCas9 complexes in HEK 293 cells using a common intronic sgHDi4 sequences.

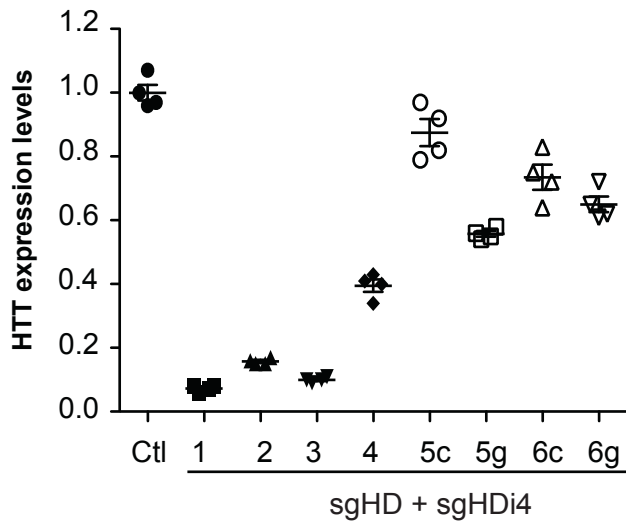

**Supplementary Figure 4:** Sanger sequencing of PCR amplified products after of HTT exon-1 editing.

**sgHD1B/i3**

```
CGGCTCAGAGTCCACGGCCGGCTGTCGCCCCGCTCCAGGCGTCCGGCGGGG--//--ATGCTTTTAGGACGCCTCGGCGGAGAGTGGCGGGGCGGGGGGGGGCGGGGAGTGAG
CGGCTCAGAGTCCACGGCCGGCTGTCGCCCCGCTCCAGGCGTCC-----CGGCGGGAGTGGCGGGGCGGGGGGGGGCGGGGAGTGAG
CGGCTCAGAGTCCACGGCCGGCTGTCGCCCCGCCCCAGGCGTCC-----CGGCGGGAGTGGCGGGGCGGGGGGGGGCGGGGAGTGAG
CGGCTCAGAGTCCACGGCCGGC-----GGGAGTGGCGGGGCGGGGGGGGGCGGGGAGTGAG
CGGCTCAGAGTCCACGGCCGGCTGTCGCCCCGCTCCAGGCGTCCG-----GCGGGAGTGGCGGGGCGGGGGGGGGCGGGGAGTGAG
```

HD promoter sequence upstream sgHD1B

HD intron 1 sequence downstream sgHDi3

**sgHD2B/i3**

```
CCCATTACAGTCTCACCACGCCCCGTCCCTCTCCGGTTGAGCCCCGCGCC--//--ATGCTTTTAGGACGCCTCGGCGGAGAGTGGCGGGGCGGGGGGGGGCGGGGAGTGAG
CCCATTACAGTCTCACCACGCCCCGTCCCTCTCC-----CGGCGGGAGTGGCGGGGCGGGGGGGGGCGGGGAGTGAGG
CCCATTACAGTCTCACCACGCCCCGTCCCTCTCC-----TCGGCGGGAGTGGCGGGGCGGGGGGGGGCGGGGAGTGAGG
CCCATTACAGTCTCACCACGCCCCGTCCCTCTCC-----CGGCGGGAGTGGCGGGGCGGGGGGGGGCGGGGAGTGA
CCCATTACAGTCTCACCACGCCCCGTCCCTCTCC-----GCGGCGGGAGTGGCGGGGCGGGGGGGGGCGGGGAGTGAG
```

HD promoter sequence upstream sgHD2B

HD intron 1 sequence downstream sgHDi3

**sgHD3B/i3**

```
CGCGGCCCCGCTCCGCCGGCGCAGCGTCTGGGACGCAAGGCGCCGTGG--//--ATGCTTTTAGGACGCCTCGGCGGAGAGTGGCGGGGCGGGGGGGGGCGGGGAGTGAG
CGCGGCCCCGCTCCGCCGGCGCAGCGTCTGGG-----CGGCGGGAGTGGCGGGGCGGGGGGGGGCGGGGAGTGAG
CGCGGCCCCGCTCCGCCGGCGCAGCGTCTGGGACGCAAGGCG-----TCGGCGGGAGTGGCGGGGCGGGGGGGGGCGGGGAGTGAG
CGCGGCCCCGCTCCGCCGGCGCAGCGTCTGGGACGCAAGGCGA-----TCGGCGGGAGTGGCGGGGCGGGGGGGGGCGGGGAGTGAG
TCCGGGCCCCGCTCCGCCGGCGCAGCGTCTGGGACGCAAGGCG-----CGGCGGGAGTGGCGGGGCGGGGGGGGGCGGGGAGTGAG
```

HD promoter sequence upstream sgHD3B

HD intron 1 sequence downstream sgHDi3

**sgHD4/i3**

```
TGGGGTCTGCGTCAGGGTTTCCTTCTTTTCAGCCCCACCCCGGTGCATC--//--ATGCTTTTAGGACGCCTCGGCGGAGAGTGGCGGGGCGGGGGGGGGCGGGGAGTGAG
TGGGGTCTGCGTCAGGGTTTCCTTCTTTTCAGCC-----GGGAGTGGCGGGGCGGGGGGGGGCGGGGAGTGAG
TGGGGTCTGCGTCAGGGTTTCCTTCTTTTCAGCC-----CGGCGGGAGTGGCGGGGCGGGGGGGGGCGGGGAGTGAG
TGGGGTCTGCGTCAGGGTTTCCTTCTTTTCAGCC-----CGGCGGGAGTGGCGGGGCGGGGGGGGGCGGGGAGTGAG
TGGGGTCTGCGTCAGGGTTTCCTTCTTTT-----CGGCGGGAGTGGCGGGGCGGGGGGGGGCGGGGAGTGAG
```

HD promoter sequence upstream sgHD4

HD intron 1 sequence downstream sgHDi3

**sgHD6C/i3**

```
CAGGTGTGGCCTGGCTAAAGTAGGCTTTACTGGGCTCCTCTCTGCCTGCATC--//--ATGCTTTTAGGACGCCTCGGCGGAGAGTGGCGGGGCGGGGGGGGGCGGGGAGTGAG
CAGGTGTGGCCTGGCTAAAGTAGGCTTTACTGGG-----CGGCGGGAGTGGCGGGGCGGGGGGGGGCGGGGAGTGAG
CAGGTGTGGCCTGGCTAAAGTAGGCTTTACTGGGC-----TCGGCGGGAGTGGCGGGGCGGGGGGGGGCGGGGAGTGAG
CAGGTGTGGCCTGGCTAAAGTAGGCTTTACTGGGC-----CGGCGGGAGTGGCGGGGCGGGGGGGGGCGGGGAGTGAG
CAGGTGTGGCCTGGCTAAAGTAGGCTTTACTGGGC-----CGGCGGGAGTGGCGGGGCGGGGGGGGGCGGGGAGTGAG
```

HD promoter sequence upstream sgHD6C

HD intron 1 sequence downstream sgHDi3

**Supplementary Figure 5: Cleavage of single sgHD/SpCas9 complexes in HEK 293 cells.**

**a**

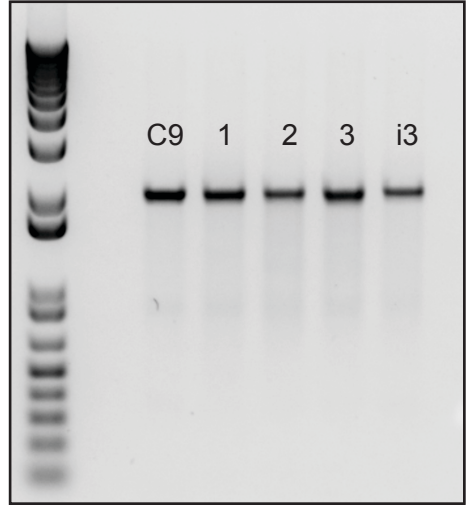

**b**

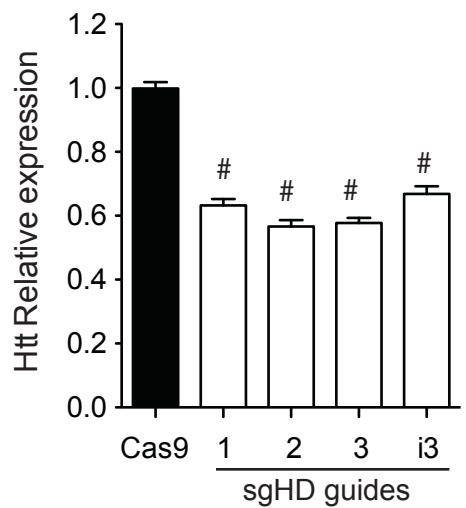

**c**

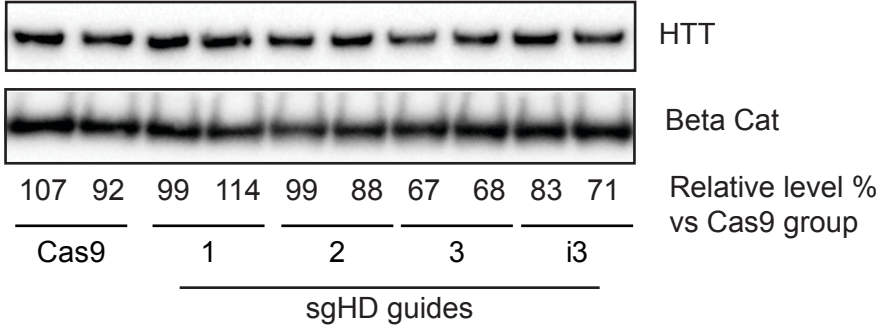

**d**

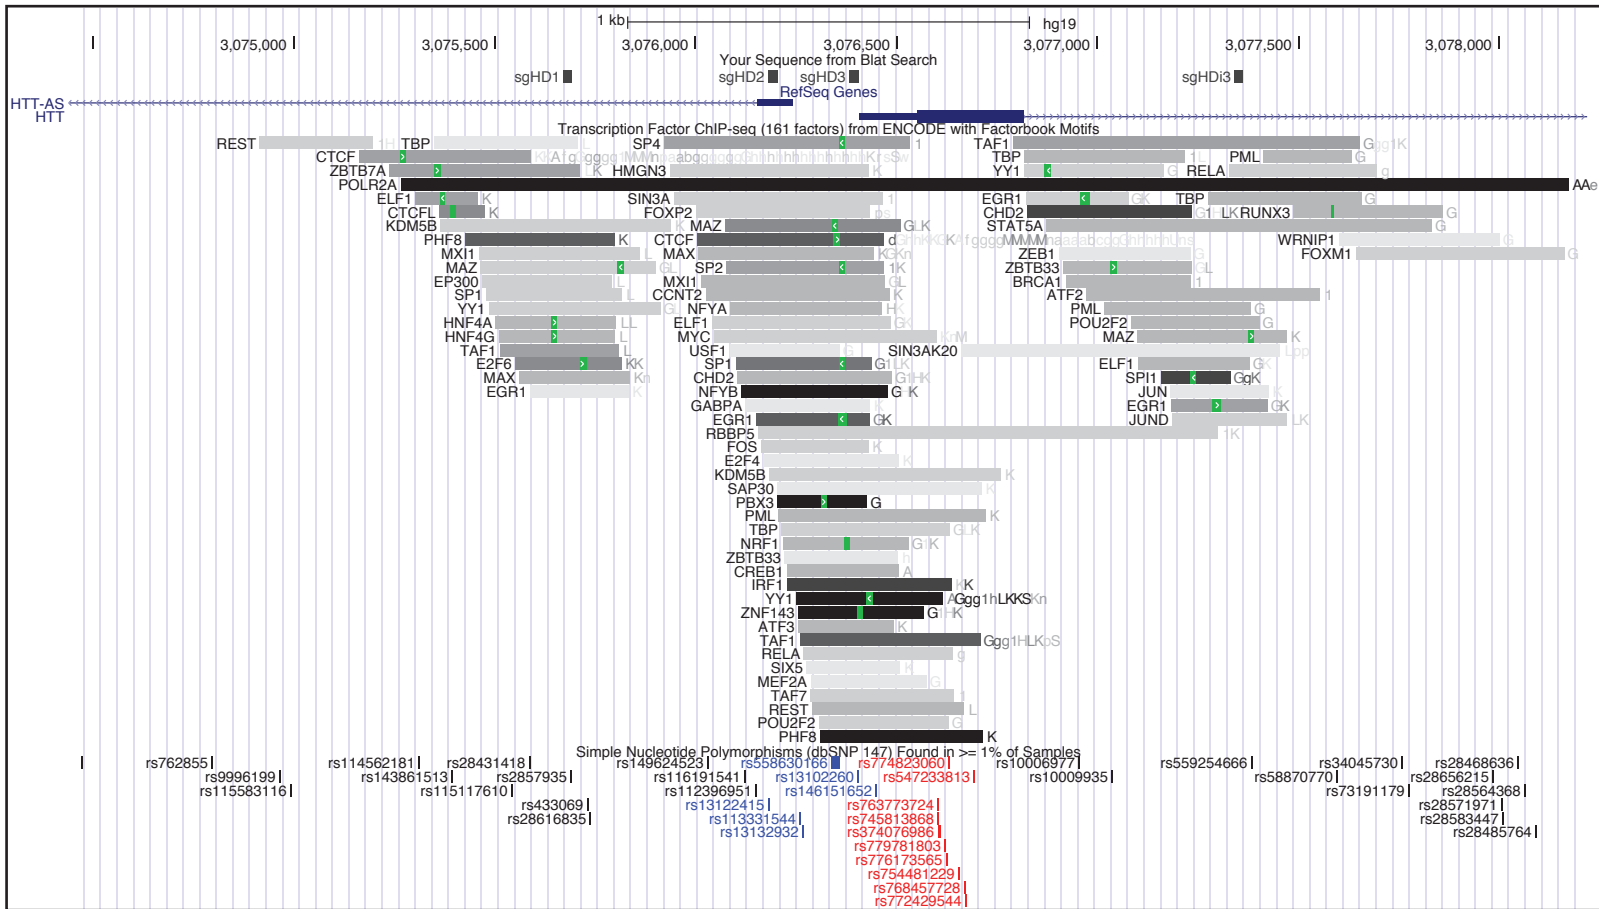

**Supplementary Figure 6: C-terminal HTT products are not generated after HTT exon-1 deletion in HEK293 cells.**

**a**

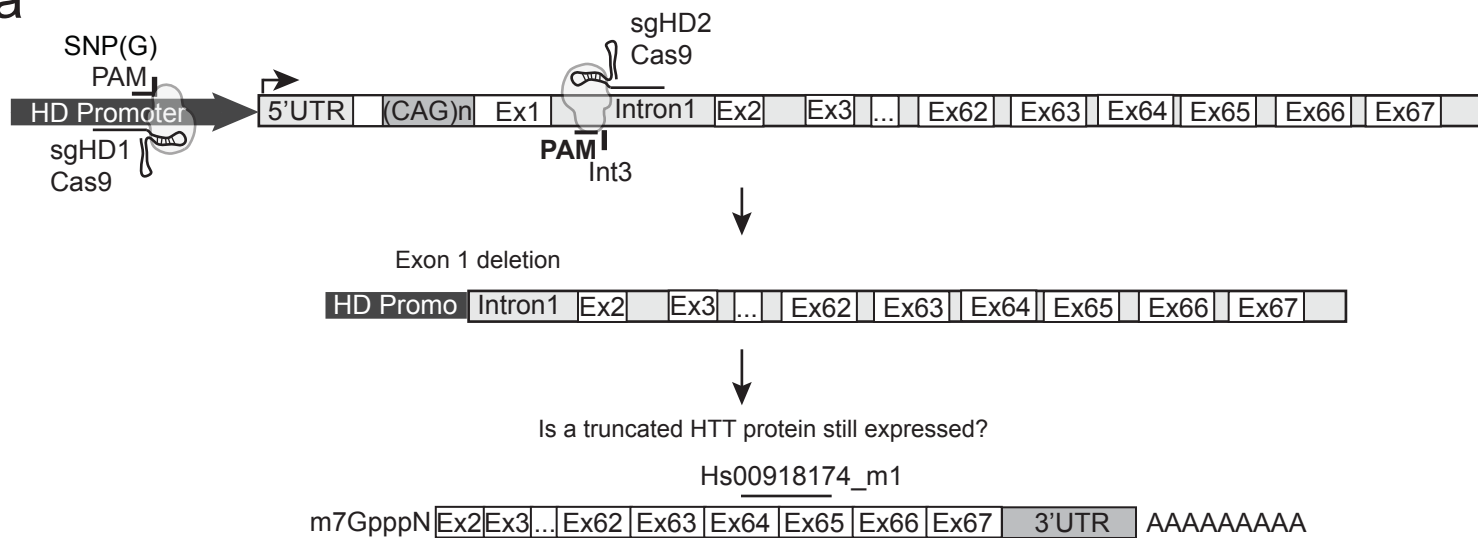

**b**

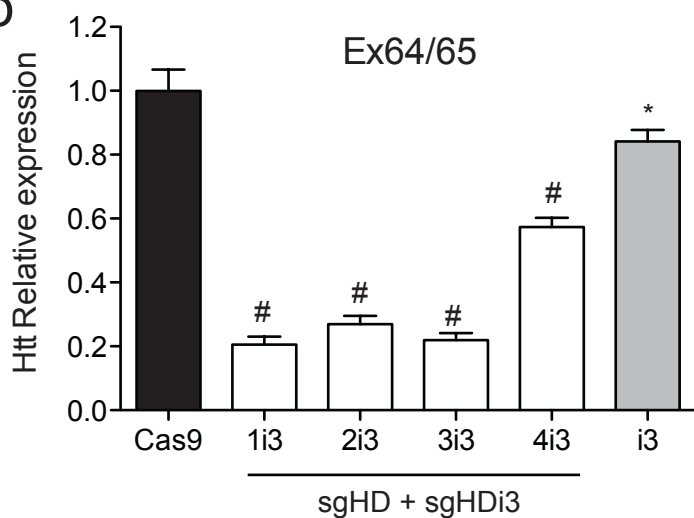

**c**

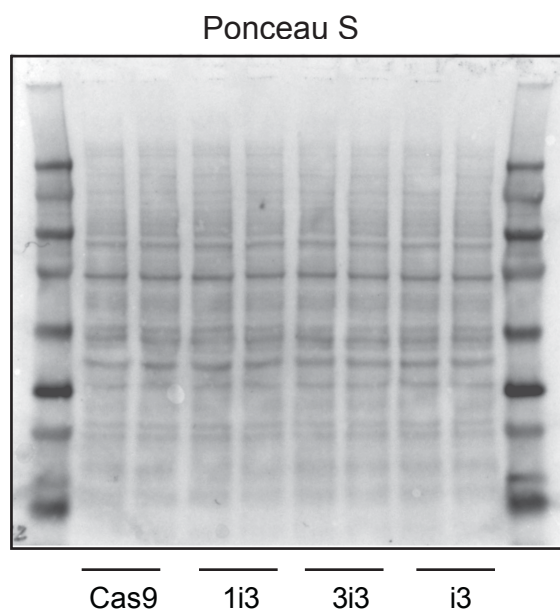

**d**

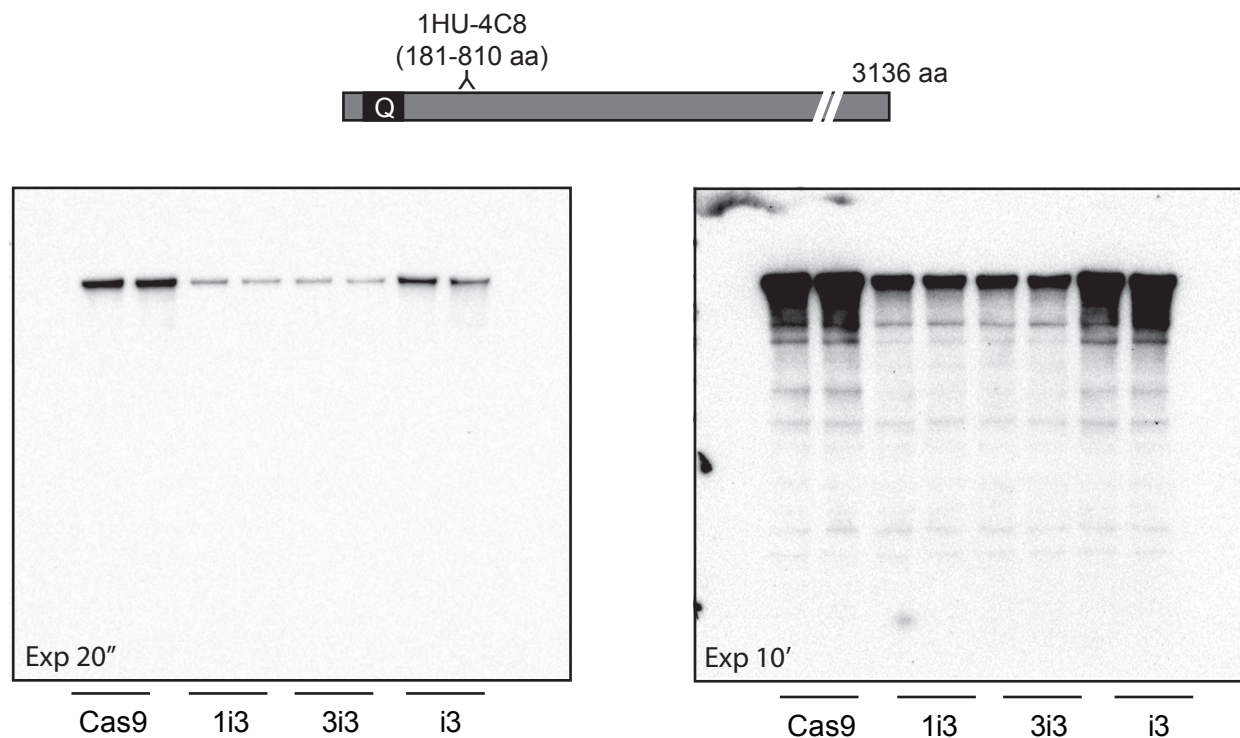

**Supplementary Figure 7:** In vitro testing of rAAV2/1 SpCas9 and rAAV2/1 vectors in HEK 293 cells.

**a**

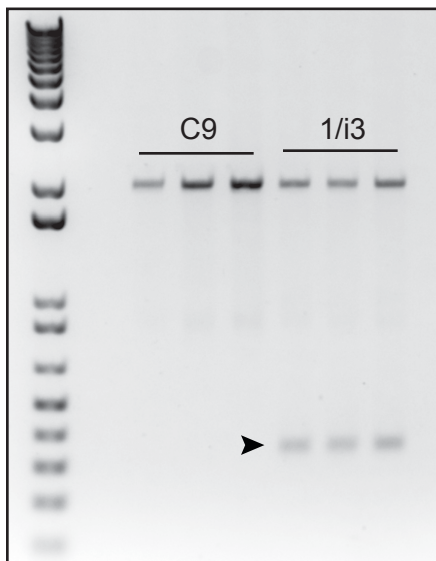

**b**

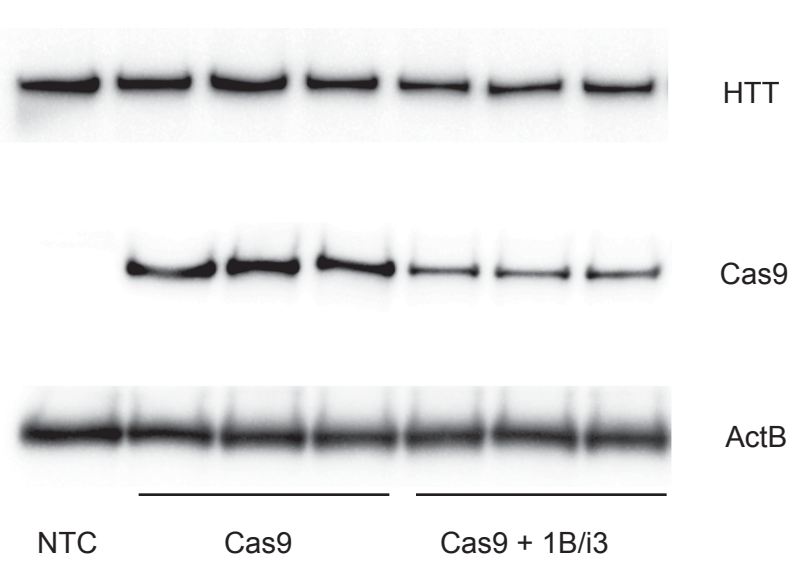

**Supplementary Figure 8: In vivo gene editing of endogenous mouse HTT allele.**

**a**

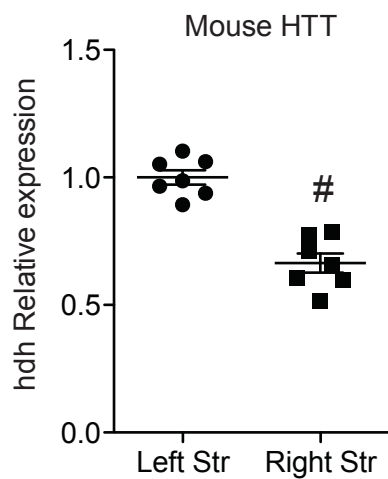

**b**

sgHDi3: GCTTTTAGGACGCCTCGGNRG  
i3OT1: GCTTTTAGGAG**gt**CTCGGCGG

sgHD1: GCTCCAGGCGTCGGCGGNRG  
1m5-OT1: **Ggcgg**AGGCG**g**CGGCGGCGG  
1m5-OT2: **GgTtg**AGGCG**ga**GGCGGCGG  
1m5-OT3: **GgaCct**GGC**ag**CGGCGGTGG

**c**

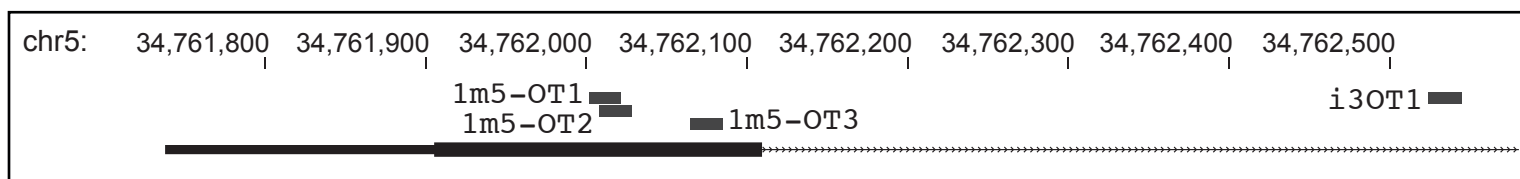

**Table S1:** List of the 36 prevalent SNPs flanking *HTT* exon-1 within the critical nucleotide position of the different CRISPR systems analyzed.

| # Variant ID | Location | Sequence Variation                                        | 1000 Genome DATA |                  |           |
|--------------|----------|-----------------------------------------------------------|------------------|------------------|-----------|
|              |          |                                                           | Ref.Allele       | Min. Allele      | MAF >0.05 |
| rs35631490   | Promoter | GTCGCGTCAGGGTTCCCTCTTTT[C/G]CAGCCCAACCCGCGTCATCCAC        | C                | G                | 0.1074    |
| rs73086139   | Promoter | TCAAGGCCTCTTCTCTTCTCGGC[A/G]GGACAGGCACAGGAGGTGGCCAGG      | A                | G                | 0.0659    |
| rs73086140   | Promoter | GCCAGGTGCATGCTTAGCTCCGCC[C/G]CCAGTGAGATCTTTCATTTAACAA     | C                | G                | 0.0962    |
| rs113541600  | Promoter | TAGGAACCTTATTCTCTCTCGCTC[-/T]TTTTTTTTTTTTTGAGACAGAGTCT    | T                | delT             | 0.2091    |
| rs61791259   | Promoter | GATTACAGGCACCTGCCACCATGCC[C/T]GGCTAATTTTTGTATTTTTAGTGA    | C                | T                | 0.0661    |
| rs61792460   | Promoter | GAGGGTTTCATCTGTGGTCCAGGC[A/G]GACTTGAACCTCCTGACCTCAGTGA    | G                | A                | 0.0966    |
| rs73086144   | Promoter | GCCACTGCGCCTCATCTCTTCTT[A/G]TGTATGTGTACGCTGTTTTCTCTT      | G                | A                | 0.0899    |
| rs73086145   | Promoter | GCTGTTTTTCTTTAGAAATGGGGG[A/G]GTTATCAGGCTCTACATGGTGTGA     | C                | G                | 0.0899    |
| rs61792461   | Promoter | TCTACATGGTGTGTAGTGGCTAGC[A/G]TGTGTAAGCCTTCCCTGTGTAC       | A                | G                | 0.0901    |
| rs61792462   | Promoter | CTGTGTCACAAGTCTCATCTGAA[C/G]AGGATTCTAATGACTGCCTGTGGCT     | C                | G                | 0.0579    |
| rs61090955   | Promoter | TCATTTTATGTGATCTCTTCTAGA[A/G]GTACTACTACTTCTGTCTGCA        | A                | G                | 0.0865    |
| rs77384845   | Promoter | TAGCTGAAGGAAGGACAGGACTGT[C/T]ATACACTAGCTAAGAGGCAAACTGC    | C                | T                | 0.0984    |
| rs10011412   | Promoter | agctgaaaggaaaggacaggactgt[C/A/G]TACACTAGCTAAGAGGCAAACTGCT | A                | G                | 0.1158    |
| rs61792464   | Promoter | TCCCTCATTGAGTTGATGCTCTAA[C/G]CCCCAGAACCTCAGAATGGGATTGT    | G                | C                | 0.1372    |
| rs112435590  | Promoter | TCCATGCCAAGAAGGACACAGAGAG[G/T]GCCAGGGAGCTGAAGTCATACCTT    | G                | T                | 0.0881    |
| rs111670395  | Promoter | CCAGGTTCAAGCAATTCTGCTCA[A/G]CCTCCGGAATAGCTGGGACTACAGG     | G                | A                | 0.0663    |
| rs762855     | Promoter | TTGAGAAGGACAGCAGAGAAACAGC[C/T]GTTAGTtcccagttcttgggaggct   | G                | A (Rev strand)   | 0.4828    |
| rs9996199    | Promoter | TGTGGCCTGGCTAAAGTAGGCTTTA[C/G]TGGGCTCCTCTGCGCTGCATCACC    | C                | G                | 0.1575    |
| rs143861513  | Promoter | TCCGGGGCGCTCGCTGGGACGAT[-/G]GGGGGGCGCAGGCCCTGTGGACACC     | -                | insG             | 0.0599    |
| rs28431418   | Promoter | CTCCCCGAGGGCTGTCCGGGTGAG[C/T]ATGGCTCTGGCCAGGGCAGTGTG      | T                | C                | 0.1438    |
| rs2857935    | Promoter | GGGCGCAGGCCCATCGGAAAGGAT[A/C/G]CCCCCGCAGCCTGGAGCGGGGG     | G                | C/T (Rev Strand) | 0.226     |
| rs28616835   | Promoter | GCGCCCGCGCTCGGCCCCCTCCA[C/T]GGCCCCCGCCCTCATGGCCCCGT       | C                | T                | 0.0839    |
| rs149624523  | Promoter | CCCCCGCCGGCCTGCCACGCCCC[C/T]ACCTCACACGCCCCCGCATCGCC       | T                | C                | 0.0927    |
| rs13122415   | Promoter | attacagtctcaccacgccccgtcc[C/G]CTCTCCGTTGAGCCCCCGCCCTCG    | C                | G                | 0.1082    |
| rs113331544  | 5' UTR   | GGCCTGTGTGTGAGGCAGAACCT[-/GCGGGG]GCGGGGGCAGGGCGGGCTGGTTCC | -                | insGCGGGG        | 0.0851    |
| rs13132932   | 5' UTR   | TGTGTGAGGCAGAACCTGCGGGGG[C/A/G]GGGGCGGGCTGGTTCCCTGGCCAGC  | A                | G                | 0.0727    |
| rs13102260   | 5' UTR   | AGCGTCTGGGACGCAAGGCCCGCTG[A/G]GGCTGCCGGGACGGGTCCAAGATG    | G                | A                | 0.1581    |
| rs10009935   | Intron 1 | CTCACTGGGTCTTCCCTTGTCTCT[C/T]CGCAGGGGAGGAGGAGCCTTGTG      | T                | C                | 0.0877    |
| rs58870770   | Intron 1 | TGAATGAGTTGTGGTTGCCAAGTAA[-/A]GTGGTGAATCTACGTGGTAAAT      | A                | delA             | 0.0845    |
| rs34045730   | Intron 1 | GAGGTGTACATTTTACCAGTATTC[C/A/T]GTCAGGCTTGCAGAAATACGGGGG   | A                | T                | 0.0589    |
| rs28656215   | Intron 1 | GGAAGTCTGTGTGTCGAGTGTACAG[C/T]AGGAGTTAGGAAGTACTCTGGTGA    | T                | C                | 0.1544    |
| rs28571971   | Intron 1 | ACAGTAGGAGTTAGGAAGTACTCTG[C/G]TGCAGTTCCAGCCTTCTCTTACCT    | G                | C                | 0.0839    |
| rs28583447   | Intron 1 | CAGTAGGAGTTAGGAAGTACTCTGG[C/T]GCAGTTCAGGCTTCTCTTACCTC     | T                | C                | 0.0839    |
| rs28468636   | Intron 1 | TCTCTTACCTCTCAGTATTCTATTT[C/G]CGATCTGGATGTGCCAGATGGCA     | C                | G                | 0.0839    |
| rs28564368   | Intron 1 | TATCTATTCCGATCTGGATGTG[A/C]CCAGATGGCATTGGTAAGAATATC       | C                | A                | 0.0839    |
| rs28485764   | Intron 1 | GATGGCATTGGTAAGAATATCTCT[A/G]TTAAGATGATTAATTTTTAGTAAT     | G                | A                | 0.0845    |
| rs77173925   | Intron 1 | GAATAAATTATTCTAAAGGATGGAA[A/G]AACTTTTTGGATATTTGGAGAAAT    | A                | G                | 0.0843    |
| rs3905238    | Intron 1 | TTGTATCATGTCAATGTACTTTA[C/T]GCAAAAATAACATTAATAAAAAAT      | A                | G (Rev Strand)   | 0.4443    |
| rs33950430   | Intron 1 | AGGTATTCACTAATTTGAGTAACA[-/AACA]CTGCTCACAAAGTTGGATTTGGC   | AACA             | delAACA          | 0.0835    |
| rs28377140   | Intron 1 | AGGCAATTAATACTTGTCTCTGGCA[C/G]TTTCTTATCTCTTCCAGATCCCTA    | G                | C                | 0.1064    |
| rs3856973    | Intron 1 | ttaaaaaataaaataaaGTTAACT[C/T]GATTAAACCTGACATTTCCATATCC    | G                | A (Rev strand)   | 0.4081    |
| rs4498089    | Intron 1 | AGTGTAACTTATTTTATTTTAA[A/G]AAAATTTGTAAGGCCCTTCCAGCAA      | A                | G                | 0.2917    |
| rs112353753  | Intron 1 | GACATGCATGCCATGCCGGGTAA[-/T]TTTTTTTTTTTCCCCGAGACGGAG      | T                | delT             | 0.1154    |
| rs75666989   | Intron 1 | CTGCAAGCTCCGCTTCCGAGTTCA[C/T]GCCATTTCTGCTCAGTCTCCCA       | C                | T                | 0.1424    |
| rs10006129   | Intron 1 | tcttgatctctgacctctgctatcc[C/G]ccgaacctgtgatccgcccacctcg   | G                | C                | 0.0845    |
| rs28696693   | Intron 1 | GGTAATTTTGTATTTTATAGTAGAG[A/G]TGGGGTTTTGCCATGATGACGAGCC   | A                | G                | 0.0839    |
| rs28393280   | Intron 1 | GGATTTTGAATCGGAAACCACTGC[A/G]CTTGTGAACCTGCTAAGTATAAC      | A                | G                | 0.0717    |

## SpCas9\_WT (NRG)

## SpCas9\_VQR/EQR (NGAN\_NGNG/NGAG)

| # Variant ID | Reference Allele |          |             | Minor allele |          |             | Reference Allele |          |             | Minor allele |          |             |
|--------------|------------------|----------|-------------|--------------|----------|-------------|------------------|----------|-------------|--------------|----------|-------------|
|              | PAM Motif        | Strand   | PAM Ref>Min | PAM Motif    | Strand   | PAM Ref>Min | PAM Motif        | Strand   | PAM Ref>Min | PAM Motif    | Strand   | PAM Ref>Min |
| rs35631490   | TGG              | Negative | Loss        | -            | -        | -           | GGAA             | Negative | Loss        | -            | -        | -           |
| rs73086139   | -                | -        | -           | -            | -        | -           | -                | -        | -           | GGCG         | Positive | Gain        |
| rs73086140   | GGG              | Negative | Loss        | CGG          | Positive | Gain        | GGCG             | Negative | Loss        | -            | -        | -           |
| rs113541600  | -                | -        | -           | -            | -        | -           | -                | -        | -           | -            | -        | -           |
| rs61791259   | -                | -        | -           | -            | -        | -           | -                | -        | -           | -            | -        | -           |
| rs61792460   | -                | -        | -           | -            | -        | -           | GGCG             | Positive | Loss        | -            | -        | -           |
| rs73086144   | -                | -        | -           | -            | -        | -           | -                | -        | -           | -            | -        | -           |
| rs73086145   | -                | -        | -           | GAG          | Positive | Gain        | -                | -        | -           | -            | -        | -           |
| rs61792461   | -                | -        | -           | -            | -        | -           | -                | -        | -           | AGCG         | Positive | Gain        |
| rs61792462   | -                | -        | -           | AAG          | Positive | Gain        | -                | -        | -           | AGAG         | Positive | Gain        |
| rs61090955   | -                | -        | -           | GAG          | Positive | Gain        | -                | -        | -           | -            | -        | -           |
| rs77384845   | -                | -        | -           | -            | -        | -           | TGAC             | Negative | Loss        | -            | -        | -           |
| rs10011412   | -                | -        | -           | -            | -        | -           | -                | -        | -           | -            | -        | -           |
| rs61792464   | GGG              | Negative | Loss        | AAG          | Positive | Gain        | -                | -        | -           | -            | -        | -           |
| rs112435590  | AGG              | Positive | Loss        | -            | -        | -           | -                | -        | -           | -            | -        | -           |
| rs111670395  | CAG              | Positive | Loss        | -            | -        | -           | -                | -        | -           | -            | -        | -           |
| rs762855     | -                | -        | -           | -            | -        | -           | -                | -        | -           | -            | -        | -           |
| rs9996199    | CAG              | Negative | Loss        | TAG          | Positive | Gain        | -                | -        | -           | -            | -        | -           |
| rs143861513  | -                | -        | -           | -            | -        | -           | -                | -        | -           | -            | -        | -           |
| rs28431418   | -                | -        | -           | -            | -        | -           | -                | -        | -           | -            | -        | -           |
| rs2857935    | GGG              | Negative | Loss        | -            | -        | -           | GGAT             | Negative | Loss        | -            | -        | -           |
| rs28616835   | -                | -        | -           | -            | -        | -           | -                | -        | -           | -            | -        | -           |
| rs149624523  | -                | -        | -           | -            | -        | -           | -                | -        | -           | -            | -        | -           |
| rs13122415   | AGG              | Negative | Loss        | -            | -        | -           | GGGG             | Positive | Loss        | -            | -        | -           |
| rs113331544  | -                | -        | -           | -            | -        | -           | -                | -        | -           | GGCG         | Positive | Gain        |
| rs13132932   | -                | -        | -           | -            | -        | -           | -                | -        | -           | GGCG         | Positive | Gain        |
| rs13102260   | TGG              | Positive | Loss        | -            | -        | -           | -                | -        | -           | TGAG         | Positive | Gain        |
| rs10009935   | -                | -        | -           | CGG          | Negative | Gain        | CGAG             | Negative | Loss        | -            | -        | -           |
| rs58870770   | -                | -        | -           | -            | -        | -           | -                | -        | -           | -            | -        | -           |
| rs34045730   | -                | -        | -           | -            | -        | -           | -                | -        | -           | -            | -        | -           |
| rs28656215   | -                | -        | -           | -            | -        | -           | -                | -        | -           | -            | -        | -           |
| rs28571971   | TGG              | Positive | Loss        | CAG          | Negative | Gain        | -                | -        | -           | -            | -        | -           |
| rs28583447   | -                | -        | -           | -            | -        | -           | -                | -        | -           | TGCG         | Negative | Gain        |
| rs28468636   | CGG              | Negative | Loss        | -            | -        | -           | -                | -        | -           | TGCG         | Positive | Gain        |
| rs28564368   | GGG              | Negative | Loss        | -            | -        | -           | GGAC/TGGG        | Neg/Neg  | Loss        | -            | -        | -           |
| rs28485764   | -                | -        | -           | -            | -        | -           | -                | -        | -           | -            | -        | -           |
| rs77173925   | -                | -        | -           | AAG          | Positive | Gain        | -                | -        | -           | AGAA         | Positive | Gain        |
| rs3905238    | -                | -        | -           | -            | -        | -           | -                | -        | -           | TGCG         | Negative | Gain        |
| rs33950430   | -                | -        | -           | -            | -        | -           | -                | -        | -           | -            | -        | -           |
| rs28377140   | CAG              | Positive | Loss        | AAG          | Negative | Gain        | -                | -        | -           | -            | -        | -           |
| rs3856973    | -                | -        | -           | -            | -        | -           | CGAG             | Negative | Loss        | -            | -        | -           |
| rs4498089    | -                | -        | -           | AAG          | Positive | Gain        | -                | -        | -           | AGAA         | Positive | Gain        |
| rs112353753  | -                | -        | -           | -            | -        | -           | -                | -        | -           | -            | -        | -           |
| rs57666989   | -                | -        | -           | -            | -        | -           | GGCG             | Negative | Loss        | -            | -        | -           |
| rs10006129   | -                | -        | -           | GGG          | Negative | Gain        | -                | -        | -           | CGGG         | Negative | Gain        |
| rs28696693   | -                | -        | -           | AGG          | Positive | Gain        | AGAT             | Positive | Loss        | -            | -        | -           |
| rs28393280   | -                | -        | -           | -            | -        | -           | -                | -        | -           | TGCG         | Positive | Gain        |



## SpCas9\_VRER (NGCG)

## SaCas9 (NNGRR/NNRR)

| # Variant ID | Reference Allele |          |             | Minor allele |          |             | Reference Allele |          |             | Minor allele |          |             |
|--------------|------------------|----------|-------------|--------------|----------|-------------|------------------|----------|-------------|--------------|----------|-------------|
|              | PAM Motif        | Strand   | PAM Ref>Min | PAM Motif    | Strand   | PAM Ref>Min | PAM Motif        | Strand   | PAM Ref>Min | PAM Motif    | Strand   | PAM Ref>Min |
| rs35631490   | -                | -        | -           | -            | -        | -           | TGCAA            | Negative | Loss        | -            | -        | -           |
| rs73086139   | -                | -        | -           | GGCG         | Positive | Gain        | -                | -        | -           | GCGGG        | Positive | Gain        |
| rs73086140   | GGCG             | Negative | Loss        | -            | -        | -           | -                | -        | -           | -            | -        | -           |
| rs113541600  | -                | -        | -           | -            | -        | -           | -                | -        | -           | -            | -        | -           |
| rs61791259   | -                | -        | -           | -            | -        | -           | CCGGG            | Negative | Loss        | -            | -        | -           |
| rs61792460   | GGCG             | Positive | Loss        | -            | -        | -           | GCGGA            | Positive | Loss        | -            | -        | -           |
| rs73086144   | -                | -        | -           | -            | -        | -           | -                | -        | -           | -            | -        | -           |
| rs73086145   | -                | -        | -           | -            | -        | -           | -                | -        | -           | -            | -        | -           |
| rs61792461   | -                | -        | -           | AGCG         | Positive | Gain        | -                | -        | -           | -            | -        | -           |
| rs61792462   | -                | -        | -           | -            | -        | -           | -                | -        | -           | AAGAG        | Positive | Gain        |
| rs61090955   | -                | -        | -           | -            | -        | -           | -                | -        | -           | -            | -        | -           |
| rs77384845   | -                | -        | -           | -            | -        | -           | -                | -        | -           | -            | -        | -           |
| rs10011412   | -                | -        | -           | -            | -        | -           | -                | -        | -           | -            | -        | -           |
| rs61792464   | -                | -        | -           | -            | -        | -           | -                | -        | -           | -            | -        | -           |
| rs112435590  | -                | -        | -           | -            | -        | -           | GAGAG            | Positive | -           | GAGAGT       | Positive | Gain        |
| rs111670395  | -                | -        | -           | -            | -        | -           | -                | -        | -           | -            | -        | -           |
| rs762855     | -                | -        | -           | -            | -        | -           | -                | -        | -           | -            | -        | -           |
| rs9996199    | -                | -        | -           | -            | -        | -           | -                | -        | -           | -            | -        | -           |
| rs143861513  | -                | -        | -           | -            | -        | -           | -                | -        | -           | -            | -        | -           |
| rs28431418   | -                | -        | -           | -            | -        | -           | GTGAGT           | Positive | Loss        | GTGAG        | Positive | -           |
| rs2857935    | -                | -        | -           | -            | -        | -           | CGGGG            | Negative | -           | CGGGGT       | Negative | Gain        |
| rs28616835   | -                | -        | -           | -            | -        | -           | -                | -        | -           | -            | -        | -           |
| rs149624523  | -                | -        | -           | -            | -        | -           | -                | -        | -           | GTGGG        | Negative | Gain        |
| rs13122415   | -                | -        | -           | AGCG         | Negative | Gain        | AGGGG            | Negative | Loss        | -            | -        | -           |
| rs113331544  | -                | -        | -           | GGCG         | Positive | Gain        | -                | -        | -           | -            | -        | -           |
| rs13132932   | -                | -        | -           | GGCG         | Positive | Gain        | -                | -        | -           | GCGGG        | Positive | Gain        |
| rs13102260   | -                | -        | -           | -            | -        | -           | TGGGG            | Positive | Loss        | -            | -        | -           |
| rs10009935   | -                | -        | -           | -            | -        | -           | -                | -        | -           | CGGGA        | Negative | Gain        |
| rs58870770   | -                | -        | -           | -            | -        | -           | -                | -        | -           | -            | -        | -           |
| rs34045730   | -                | -        | -           | -            | -        | -           | -                | -        | -           | -            | -        | -           |
| rs28656215   | -                | -        | -           | -            | -        | -           | -                | -        | -           | -            | -        | -           |
| rs28571971   | -                | -        | -           | -            | -        | -           | -                | -        | -           | -            | -        | -           |
| rs28583447   | -                | -        | -           | GGCG/TGCG    | Pos/Neg  | Gain        | -                | -        | -           | -            | -        | -           |
| rs28468636   | -                | -        | -           | TGCG         | Positive | Gain        | CGGAA            | Negative | Loss        | -            | -        | -           |
| rs28564368   | -                | -        | -           | -            | -        | -           | -                | -        | -           | -            | -        | -           |
| rs28485764   | -                | -        | -           | -            | -        | -           | -                | -        | -           | -            | -        | -           |
| rs77173925   | -                | -        | -           | -            | -        | -           | -                | -        | -           | AAGAA        | Positive | Gain        |
| rs3905238    | -                | -        | -           | TGCG         | Negative | Gain        | -                | -        | -           | -            | -        | -           |
| rs33950430   | -                | -        | -           | -            | -        | -           | -                | -        | -           | -            | -        | -           |
| rs28377140   | -                | -        | -           | -            | -        | -           | -                | -        | -           | -            | -        | -           |
| rs3856973    | -                | -        | -           | -            | -        | -           | TCGAGT           | Negative | Loss        | -            | -        | -           |
| rs4498089    | -                | -        | -           | -            | -        | -           | -                | -        | -           | AAGAA        | Positive | Gain        |
| rs112353753  | -                | -        | -           | -            | -        | -           | -                | -        | -           | -            | -        | -           |
| rs57666989   | GGCG             | Negative | Loss        | -            | -        | -           | -                | -        | -           | -            | -        | -           |
| rs10006129   | GGCG             | Negative | Loss        | -            | -        | -           | -                | -        | -           | GCGGG        | Negative | Gain        |
| rs28696693   | -                | -        | -           | -            | -        | -           | -                | -        | -           | -            | -        | -           |
| rs28393280   | -                | -        | -           | TGCG/AGCG    | Pos/Neg  | Gain        | -                | -        | -           | -            | -        | -           |



**Supplementary Table 2:** List of prevalent SNPs upstream human HTT exon-1.

| SNP ID | Variant ID | Location  | SNP   | Allele frequency |            | Strand | PAM       |
|--------|------------|-----------|-------|------------------|------------|--------|-----------|
|        |            |           |       | Reference        | 1000G MAF  |        |           |
| SNP4   | rs35631490 | 3,071,679 | C/G   | C=0.8926         | G = 0.1074 | +      | Loss      |
| SNP5   | rs61792464 | 3,073,385 | G/C   | G=0.8628         | C = 0.1372 | +      | Gain/Loss |
| SNP6   | rs9996199  | 3,074,965 | C/G   | C=0.8425         | G = 0.1575 | +      | Gain/Loss |
| SNP1   | rs2857935  | 3,075,691 | C/G/T | C=0.7710         | G= 0.2260  | -      | Loss      |
| SNP2   | rs13122415 | 3,076,181 | C/G   | C=0.8918         | G = 0.1082 | +      | Loss      |
| SNP3   | rs13102260 | 3,076,405 | G/A   | G=0.8419         | A = 0.1581 | +      | Loss      |

**Supplementary Table 3: SNP genotyping of 23 HD fibroblast lines.**

| HD Fibroblast | CAG repeat | SNP1                          | SNP2                          | SNP3                          | SNP4                          | SNP5                          | SNP6                          |
|---------------|------------|-------------------------------|-------------------------------|-------------------------------|-------------------------------|-------------------------------|-------------------------------|
|               |            | rs2857935<br>(C>G/T)<br>0.226 | rs13122415<br>(C>G)<br>0.1082 | rs13102260<br>(G>A)<br>0.1581 | rs35631490<br>(C>G)<br>0.1074 | rs61792464<br>(C>G)<br>0.1372 | rs9996199<br>( C>G)<br>0.1575 |
| GM04723       | CAG:72     | C/G                           | C                             | G                             | C                             | G                             | C                             |
| GM04869       | CAG:50     | C                             | C                             | G                             | C                             | G                             | C                             |
| GM04767       | CAG:47     | C/G                           | C                             | G                             | C                             | G                             | C                             |
| GM04887       | ND         | C                             | C                             | G                             | C                             | G                             | C                             |
| GM04849       | ND         | C                             | C                             | G                             | C                             | G                             | C                             |
| GM04689       | CAG:46     | C                             | C                             | G                             | C                             | G                             | C                             |
| ND29801       | CAG:40     | C                             | C                             | G                             | C                             | G                             | C                             |
| ND29970       | CAG:40     | C                             | C                             | G/A                           | C                             | G/C                           | G/C                           |
| ND30013       | CAG:43     | C                             | C                             | G                             | C                             | G                             | C                             |
| ND30015       | CAG:41     | C/G                           | C                             | G                             | C                             | G                             | C                             |
| ND30016       | CAG:41     | C/G                           | C                             | G                             | C                             | G                             | C                             |
| ND30047       | CAG:41     | C/G                           | C                             | G                             | C                             | G                             | C                             |
| ND30259       | CAG:38     | C                             | C                             | G                             | C                             | G                             | C                             |
| ND30422       | CAG:40     | C/G                           | C                             | G                             | C                             | G                             | C                             |
| ND30626       | CAG:41     | C/G                           | C                             | G                             | C                             | G                             | C                             |
| ND30967       | CAG:43     | C                             | C                             | G                             | C                             | G                             | C                             |
| ND31038       | CAG:44     | C/G                           | C                             | G                             | C                             | G                             | C                             |
| ND31551       | CAG:39     | C/G                           | C/G                           | G/A                           | C/G                           | G                             | G/C                           |
| ND31846       | CAG:40     | C                             | C                             | G                             | C                             | G                             | C                             |
| ND33392       | CAG:57     | C/G                           | C                             | G                             | C                             | G                             | C                             |
| ND33947       | CAG:40     | C/G                           | C                             | G                             | C                             | G                             | C                             |
| ND40536       | CAG:66     | C                             | C                             | G                             | C                             | G                             | C                             |
| ND40534       | CAG:46/26  | C                             | C                             | G                             | C                             | G                             | C                             |

**Supplementary Table 4:** Genotyping of the nucleotide variation in the mutant and normal allele of HD fibroblast lines heterozygotic for SNP1.

**a**

| HD Fibroblast | CAG repeat | SNP | Huntingtin Allele |          |          | Family    |
|---------------|------------|-----|-------------------|----------|----------|-----------|
|               |            |     | Normal            | Mutant   | Targeted |           |
| GM04723       | CAG:72/17  | C/G | G                 | <b>C</b> | Mutant   | 691       |
| GM04767       | CAG:47/18  | C/G | G                 | <b>C</b> | Mutant   | 691       |
| ND30015       | CAG:41/20  | C/G | G                 | <b>C</b> | Mutant   | NINDS3749 |
| ND30016       | CAG:41/21  | C/G | G                 | <b>C</b> | Mutant   | NINDS3749 |
| ND30047       | CAG:41/18  | C/G | G                 | <b>C</b> | Mutant   | NINDS3753 |
| ND30422       | CAG:40/18  | C/G | G                 | <b>C</b> | Mutant   | NINDS3751 |
| ND30626       | CAG:41/21  | C/G | G                 | <b>C</b> | Mutant   | NINDS3752 |
| ND31038       | CAG:44/19  | C/G | <b>C</b>          | G        | Normal   | NINDS3752 |
| ND31551       | CAG:39/18  | C/G | <b>C</b>          | G        | Normal   | Unknown   |
| ND33392       | CAG:57/17  | C/G | G                 | <b>C</b> | Mutant   | NINDS4250 |
| ND33947       | CAG:40/18  | C/G | G                 | <b>C</b> | Mutant   | Unknown   |

**b**

**SNP1: rs2857935 (C/G/T) PAM: Loss**

Major Allele (C): PAM motif on the Positive strand (NGG)

PAM

5' GTCGCCCCGCTCCAGGCGTCGGCGG**GGG**ATCCTTTCCGCATGGGCCTGC 3'  
 3' CAGCGGGGCGAGGTCCGCAGCCGCC**CC**C**C**TAGGAAAGGCGTACCCGGACG 5'  
 5' GCTCCAGGCGTCGGCGG 3' ▲

Minor Allele (G): Disruption of the PAM motive.

5' GTCGCCCCGCTCCAGGCGTCGGCGGGGCATCCTTTCCGCATGGGCCTGC 3'  
 3' CAGCGGGGCGAGGTCCGCAGCCGCC**G**TAGGAAAGGCGTACCCGGACG 5'  
 ▲

Minor Allele (T): Disruption of the PAM motive.

5' GTCGCCCCGCTCCAGGCGTCGGCGGGGAATCCTTTCCGCATGGGCCTGC 3'  
 3' CAGCGGGGCGAGGTCCGCAGCCGCC**T**TAGGAAAGGCGTACCCGGACG 5'  
 ▲

Table S5

**Oligos to generate guide sequences:**

| <b>Name:</b> | <b>Sequence</b>          |
|--------------|--------------------------|
| PosCRPAS1    | caccGCTCCAGGCGTCGGCGG    |
| NegCRPAS1    | aaacCCGCCGACGCCTGGAGC    |
| PosCRPAS2    | caccGGCGCGGGGCTCAACGGAG  |
| NegCRPAS2    | aaacCTCCGTTGAGCCCCGCGCC  |
| PosCRPAS3    | caccGTCTGGGACGCAAGGCGCCG |
| NegCRPAS3    | aaacCGGCGCCTTGCGTCCCAGAC |
| PosCRPAS4    | caccGATGCACGCGGGGTGGGGC  |
| NegCRPAS4    | aaacGCCCCACCCCGCGTGCATC  |
| PosCRPAS5G   | tcccATTACAGGTTGATGCCT    |
| NegCRPAS5G   | aaacAGGACATCAACCTGAAT    |
| PosCRPAS5C   | tcccATCCCATTCTGAGGTTCTGG |
| NegCRPAS5C   | aaacCCAGAACCTCAGAATGGGAT |
| PosCRPAS6C   | caccGCAGGCAGAGAGGAGCC    |
| NegCRPAS6C   | aaacGGCTCCTCTCTGCCTGC    |
| PosCRPAS6G   | caccGCCTGGCTAAAGTAGGCTT  |
| NegCRPAS6G   | aaacAAGCCTACTTTAGCCAGGC  |
| PosCRI3      | caccGCTTTTAGGACGCCTCGG   |
| NegCRI3      | aaacCCGAGGCGTCCTAAAAGC   |
| PosCRI4      | caccGCGGGACACTTCGAGAGG   |
| NegCRI4      | aaacCCTCTCGAAGTGTCCCGC   |

**Primers to assess cleavage**

| <b>Name:</b> | <b>Sequence</b>                      |
|--------------|--------------------------------------|
| Fwd1SNP      | 5'-GAC CAC GCG CAT TCT CT -3'        |
| Fwd4SNP      | 5'- GGA AAC AGG ACA GAT GAA GGAG- 3' |
| Fwd5SNP      | 5'- CAG CTC AGA CGG AAG TGT ATT T-3' |
| Fwd6SNP      | 5'-CTC CCA AGA ACT GGG AAC TAA C 3'  |
| Rev3Cleavage | 5'-ACC ACC GTG ATC ATG AAC TAA A-3'  |

| <b>Name:</b> | <b>Sequence</b>       |
|--------------|-----------------------|
| Fwd HTT      | TCGGTGCAGCGGCTCCTC    |
| Rev HTT      | ATGGCGACCCTGAAAAAGCTG |
| FwdActB      | TTCGCGGGCGACGATGC     |
| RevActB      | CGTACATGGCTGGGGTGTG   |
